## Sand dropseed - a new pest in Eurasia

### Sand dropseed (*Sporobolus cryptandrus*) – A new pest in Eurasian sand areas?

\*Török P.<sup>1,2</sup>, Schmidt D.<sup>3</sup>, Bátori Z.<sup>4</sup>, Aradi E.<sup>5</sup>, Kelemen A.<sup>5,6</sup>, Hábenczyus A. A.<sup>4</sup>, Diaz C. P.<sup>2</sup>, Tölgyesi C.<sup>1,4</sup>, Pál R.W.<sup>7</sup>, Balogh N.<sup>1</sup>, Tóth E.<sup>1,2</sup>, Matus G.<sup>8</sup>, Táborská J.<sup>9</sup>, Sramkó G.<sup>8,10</sup>, Laczkó L.<sup>8,10</sup>, Jordán S.<sup>8,10</sup>, Sonkoly J.<sup>1,2</sup>

<sup>1</sup>MTA-DE Lendület Functional and Restoration Ecology Research Group, 4032 Debrecen, 1 Egyetem sqr., Hungary

<sup>2</sup>Department of Ecology, University of Debrecen, 4032 Debrecen, 1 Egyetem sqr., Hungary

<sup>3</sup>University of Sopron, Institute of Botany and Nature Conservation, 9700 Sopron, 4 Bajcsy-Zs. str., Hungary

<sup>4</sup>Department of Ecology, University of Szeged, 6726 Szeged, 52 Közép boulevard, Hungary

<sup>5</sup>Kiskunság National Park Directorate, 19 Liszt Ferenc str., 6000 Kecskemét, Hungary

<sup>6</sup>Lendület Seed Ecology Research Group, Institute of Ecology and Botany, Centre for Ecological Research, 2-4 Alkotmány Street, 2163 Vácrátót, Hungary

<sup>7</sup>Department of Biological Sciences, Montana Technological University, 1300 W Park Street, Butte, MT 59701, USA

<sup>8</sup>Department of Botany, University of Debrecen, 4032 Debrecen, 1 Egyetem sqr., Hungary

<sup>9</sup>Department of Botany and Plant Physiology, Eszterházy Károly University, 3300 Eger, 6 Leányka str., Hungary.

<sup>10</sup>MTA-DE "Lendület" Evolutionary Phylogenomics Research Group, 4032 Debrecen, 1 Egyetem sqr., Hungary

\*Corresponding author: molinia@gmail.com

**Running head:** Sand dropseed – a new pest in Eurasia

#### Abstract

For the effective control of an invasive species, gathering as much information as possible on its ecology, establishment and persistence in the subjected communities is of utmost importance. We aimed to review the current distribution and characteristics of *Sporobolus cryptandrus* (sand dropseed), an invasive C4 grass species of North American origin recently discovered in Hungary. We aimed to provide information on (i) its current distribution paying special attention to its invasion in Eurasia; (ii) the characteristics of the invaded habitats in Central Europe; (iii) seed bank formation and germination characteristics, crucial factors in early establishment; and (iv) the effects of its increasing cover on vegetation composition. Finally, we aimed to (v) point out further research directions that could enable us to understand the invasion success of this potential invasive species. Field surveys uncovered large stands of the species in Central and Eastern Hungary with most of the locations in the former, especially the Kiskunság region. The species invaded disturbed stands of dry and open sand grasslands, closed dune slack grasslands and it also penetrates into natural open sand grasslands from neighbouring disturbed habitats. Increasing cover of *Sporobolus cryptandrus* caused a decline in species richness and abundance of subordinate species both in the vegetation and seed banks, but a low density of *Sporobolus cryptandrus* can even have a weak positive effect on these characteristics. Viable seeds of *Sporobolus* were detected from all soil layers (2.5 cm layers measured from the surface to 10 cm in depth), which indicates that the species

## Sand dropseed - a new pest in Eurasia

49 is able to form a persistent seed bank (1,114 to 3,077 seeds/m<sup>2</sup> with increasing scores towards  
50 higher abundance of the species in vegetation). Germination of *Sporobolus cryptandrus* was  
51 negatively affected by both litter cover and 1 cm deep soil burial. To sum up, *Sporobolus*  
52 *cryptandrus* can be considered as a transformer invasive species, whose spread forms a high risk for  
53 dry sand and steppe grasslands in Eurasia. We can conclude that for the effective suppression of the  
54 species it is necessary: (i) to clarify the origin of the detected populations; (ii) to assess its  
55 competitive ability including its potential allelopathic effects; (iii) to assess its seed bank formation  
56 potential in habitats with different abiotic conditions; and (iv) to assess the possibility of its  
57 suppression by natural enemies and management techniques such as mowing or livestock grazing.

58

59 **Keywords:** plant invasion; C4 grass; seed bank; germination; sand grassland; steppe; grazing;  
60 transformer species

61

## Sand dropseed - a new pest in Eurasia

62

### 63 **Introduction**

64

65 The distribution range and abundance of invasive plants have dramatically increased in recent  
66 decades providing a serious challenge for protection, conservation, and restoration of natural and  
67 semi-natural habitats worldwide (van Kleunen et al. 2019, Pyšek et al. 2020). While casual  
68 establishment of alien species in various natural ecosystems became a relatively frequent  
69 phenomenon as a consequence of increased human influence, transformer invasive species form one  
70 of the most serious threats for natural communities and ecosystems (Richardson et al. 2000).  
71 Transformer invasive species often reduce biodiversity, alter disturbance regimes, and affect  
72 ecosystem structure and functions in the subjected communities (Richardson et al. 2000, Byers et al.  
73 2010, Catford et al. 2011).

74

75 For the effective control of an invasive species, it is crucial to collect as much information as  
76 possible on (i) their ecology, especially establishment and persistence characteristics, and on (ii)  
77 communities potentially threatened by its invasion. It is also crucial to detect the plant invasion in  
78 an early stage, when the distribution of the invasive species is still limited to one or a few isolated  
79 locations, where its eradication still might be possible. However, this is rather challenging for  
80 inconspicuous species (such as certain grasses), which are usually difficult to determine and to  
81 detect (Jarić et al. 2019). Members of the Poaceae and Asteraceae families contribute most of the  
82 aggressive invasive plant species across the globe (Pyšek et al. 2017). Invasions of many short-lived  
83 and perennial grasses present serious problems worldwide including grasses characterised either by  
84 C3 or C4 photosynthetic pathway (D'Antonio & Vitousek 1992, Fusco et al. 2019, van Kleunen et  
85 al. 2019). The C4 photosynthetic pathway provides many advantages over the C3 one in arid and  
86 warm climate, such as carbon fixation with a lower water cost, higher temperature optimum for  
87 carbon fixation, lower sensitivity to water stress and high fire resistance (Johnston 1996).

## Sand dropseed - a new pest in Eurasia

88

89 Thermophilic neophytes include numerous species of Poaceae with the C4 photosynthetic pathway,  
90 which have become constant elements of some warm ruderal communities in Eurasia (Leuschner &  
91 Ellenberg, 2017). Introduced C4 grasses have already caused dramatic losses of biodiversity in the  
92 Americas (e.g., savanna and forest ecosystems in central and South America or desert grasslands  
93 and dry woodlands in the North America, Williams & Brauch 2000) or in Australia (e.g., tropical  
94 grasslands in Australia, Brooks et al. 2010). Similarly, the Eurasian steppe zone is characterised by  
95 the prevailing dominance of C3 grasses with only some notable exceptions of C4 species (e.g.,  
96 *Botriochloa ischaemum*, *Cynodon dactylon*), which are thought to be introduced in historical times  
97 (Hurka et al. 2019). According to the projected climate change scenarios, global temperatures will  
98 increase in the future, likely resulting in an increased expansion of C4 grasses in plant communities  
99 of arid environments of Eurasia. Direct and indirect effects of climate change include the increase  
100 of minimum and maximum temperatures, the increasing frequency and magnitude of droughts in  
101 the vegetation period, and the changing annual distribution of precipitation shifting the peak of  
102 precipitation from the vegetation period to the dormant period (in Central Europe shifting from the  
103 summer period to winter, IPCC 2013). This means that increased levels of aridity, increased  
104 likeliness of weather extremities, and the associated increased risk of extreme fire events favour the  
105 formation and spread of more drought-adapted communities and species. The decline of dominant  
106 native C3 grasses like *Festuca* species increases the risk of invasion via the colonization of drought-  
107 adapted non-native C4 species. The effects of climate change may be amplified at the regional scale  
108 by large-scale water regulation works and the increased demand for irrigation in agricultural areas,  
109 or by the high transpiration rate of established non-native tree plantations (Tölgyesi et al. 2020).  
110 The water-stressed open sand grasslands are excellent targets for the establishment of non-native C4  
111 plant species. The establishment and the effects of several invasive herbaceous species on the native  
112 communities have been studied and reported for sand regions (e.g., *Asclepias syriaca* – Kelemen et  
113 al. 2016 or *Conyza canadensis* – Mojzes et al. 2020).

## Sand dropseed - a new pest in Eurasia

114

115 In the current paper, we aim to study the current distribution and characteristics of *Sporobolus*  
116 *cryptandrus* (sand dropseed), an invasive C4 grass species of North American origin, recently  
117 detected in Hungary (Török & Aradi 2017). We aim to evaluate its effects on the native sand  
118 grassland vegetation by analysing stands along an increasing *Sporobolus* abundance gradient. In  
119 particular, we aim to provide information on (i) the current distribution of the species with special  
120 attention to its invasion in Eurasia by summarising published occurrence data, (ii) the characteristics  
121 of the invaded habitats in Central Europe, (iii) seed bank formation and germination characteristics,  
122 crucial in early establishment of the species, and on (iv) the effects of increasing cover of the  
123 species on vegetation composition. Finally, we aim to (v) point out further research directions that  
124 would help to understand the invasion success of this species, and to (vi) evaluate possible  
125 management techniques to control it.

126

## 127 **Materials and methods**

128

### 129 Morphological characteristics and ecology of the species

130

131 The species is a member of the dropseed genus (*Sporobolus* R.Br.) consisting of more than 160  
132 species with the highest number of endemic species in Africa, Australasia, North and South  
133 America (Simon & Jacobs 1999, Király & Hohla 2015). Species in the genus are typical in tropical  
134 and warm temperate climate, generally tolerate drought but can also be found in saline habitats from  
135 loose sandy soils to heavy floodplain soils (Simon & Jacobs 1999). Sand dropseed (*Sporobolus*  
136 *cryptandrus* (Torr.) A.Gray) is a perennial bunchgrass with a height of 40–80 cm (up to 100 cm  
137 with inflorescences). Both the auricula and the ligula are very short and at the orifice of the sheaths,  
138 on the leaves' margin around the nodes there is a collar of dense white hairs, but scattered hairiness  
139 is typical also for the whole leaf edge. The edge of the 4–5 mm wide leaves is sharp, but the leaves

## Sand dropseed - a new pest in Eurasia

140 are softer than the leaves of a *Calamagrostis*. The inflorescences are at least partly covered by the  
141 flag leaf but are very similar to those of an *Agrostis*, not surprisingly formerly the genus was  
142 classified together with the latter one (Figure 1, Simon & Jacobs 1999). The species is characterised  
143 by a C4 photosynthetic pathway. It produces very tiny propagules in high abundance (the caryopsis  
144 is *ca* 1 mm in length); based on literature data, one individual is able to produce up to ten-thousand  
145 seeds (Brown 1943). The thousand-seed weight of the species is 0.083 g (Török et al., unpublished).  
146 It was also reported that the epicarp of the seeds becomes sticky when wet, which, besides the small  
147 weight of the seeds, may contribute to its effective dispersal (Holub & Jehlík 1987). Seeds have  
148 high viability but a high proportion of them can become dormant, which means that dormancy  
149 breaking in the form of stratification, moist conditions and/or scarification is necessary for  
150 successful germination (Holub & Jehlík 1987, Sartor & Malone 2010). The species is likely able to  
151 build up persistent seed banks in its native range (Clements et al. 2007) and might have an  
152 allelopathic effect on the germination of other species as extrapolated from *Sporobolus pyramidatus*  
153 (Lam.) Hitchc. (Rasmussen & Rice 1971).

154

155 Distribution range of the species

156

157 The native range of *S. cryptandrus* lays in North America including the United States, Southern  
158 Canada, and the northern part of Mexico (Britton & Brown 1970; Holub & Jehlík 1987;  
159 Lackschewitz 1991; Nobis et al. 2015). The species is typical in short-grass prairies, sagebrush  
160 deserts, and chaparral communities but sometimes also enters the sagebrush steppe (Hitchcock et al.  
161 1969, Tilley et al. 2009, Lesica 2012). In its native range it is a member of the climax plant  
162 communities on deep sands, while on heavier soils it is an early successional colonizer. The plant is  
163 extremely drought-tolerant and it is highly competitive with co-occurring native species even in  
164 desert climates (Wan et al. 1993, Ogle et al. 2009, Tilley et al. 2009). Typically, it grows at lower  
165 elevations on sandy soils (which explains the English colloquial name: sand dropseed), mainly on

## Sand dropseed - a new pest in Eurasia

166 disturbed sites such as dry riverbeds, rocky slopes, and along roadsides. It can also be found at  
167 higher elevations and coarser soils. The plant is extremely drought tolerant and highly competitive  
168 with co-occurring native species even in desert climates (Wan et al. 1993, Ogle et al. 2009, Tilley et  
169 al. 2009).

170

171 Outside of its native range, the species has been reported from Australia and Tasmania, Japan, New  
172 Zealand, and Argentina (Edgar & Connor 2000, Curto 2012, Randall 2017). In Eurasia, the species  
173 was detected formerly in several locations (Figure 2). *Sporobolus cryptandrus* is known from  
174 isolated locations from Austria, France, Germany, Italy, the Netherlands, Russia, Slovakia, Spain,  
175 Switzerland, Ukraine, and the United Kingdom (Murr 1902, Thellung 1919, Ryves et al. 1988, Sani  
176 et al. 2015, Dflor 2021, NBMC 2021, Electronic Appendix 1). Amongst the first naturalised  
177 populations was a riverbank near Bratislava, Slovakia (Holub & Jehlík 1987). Large-scale spreading  
178 was reported also into steppe habitats in Western Russia and Ukraine (Alekseev et al. 1996, Kuvaev  
179 & Stepanova 2014, Demina et al. 2016, Gouz & Timoshenkova 2017, Demina et al. 2018, Maltsev  
180 & Sagalev 2018). Historical data of the species were reported from the western part of Hungary,  
181 near to the city of Győr (= *Sporobolus subinclusus*, 1927 in Polgár 1933, one specimen detected  
182 from the territory of an oil seed factory, and likely originated from Argentina), but the data cannot  
183 be validated and was not supported with a herbarium sheet. In 2016, the species was discovered in  
184 two sandy regions of Hungary, in the city of Debrecen (Nyírség region, acidic sand) and near the  
185 town Kiskunhalas (Kiskunság region, calcareous sand) in several small locations (Török & Aradi  
186 2017, Erdős et al. 2018, Molnár et al. 2020).

187

## Sand dropseed - a new pest in Eurasia

188

### 189 **Vegetation and soil sampling**

190

191 After its discovery in Eastern and Central Hungary (Debrecen, Nyírség region and Kiskunhalas,  
192 Kiskunság region, respectively; Török & Aradi 2017) more detailed and systematic surveys were  
193 initiated. The largest locality of the species in Debrecen and four localities with large established  
194 populations in the Kiskunság region were selected for a detailed vegetation sampling (Table 1). In  
195 each site, plots along an increasing cover gradient of *Sporobolus cryptandrus* were sampled. We  
196 sampled reference plots with no *Sporobolus* (cover category I), and plots characterised with 1-25%,  
197 26-50% or 51-75% cover of the species (cover categories II, III and IV, respectively), but in the  
198 latter case *Sporobolus* cover rarely exceeded 70%. Altogether, 10 plots per cover group (altogether  
199 40 plots per site) were recorded, the percentage cover of all vascular plant species were assessed in  
200 the summer of 2019.

201

202 For detailed soil analyses, we sampled the topsoil (<5 cm) with a small spade from 40 random  
203 locations per site near the vegetation plots (10 samples for each cover category pooled, about 500 g  
204 air-dried soil per pooled sample, 4 pooled samples per site). The following soil characteristics were  
205 measured: pH (KCl), soil compactness (this figure is strongly related to the physical texture of the  
206 soil; higher scores refer to higher proportion of loam-clay), calcium – CaCO<sub>3</sub> (m/m%), humus  
207 (m/m%), nitrogen – NO<sub>2</sub> + NO<sub>3</sub> content (mg/kg), phosphorous – P<sub>2</sub>O<sub>5</sub> (mg/kg), potassium – K<sub>2</sub>O  
208 (mg/kg). Soil analyses were conducted in an accredited laboratory (SYNLAB, Mosonmagyaróvár,  
209 Hungary) based on the standardised methods included in the Hungarian standards MSZ-08-  
210 0205:1978 (Evaluation of some chemical properties of the soil. Laboratory tests) and MSZ-08-  
211 0206-2:1978 (Determination of physical and hydrophysical properties of soils).

212



## Sand dropseed - a new pest in Eurasia

213

### 214 **Soil seed banks**

215

216 We screened the composition of soil seed banks in plots characterised by different levels of  
217 *Sporobolus* cover at the Debrecen site. In three plots per cover group, we collected 10 soil cores (10  
218 cm depth and 2 cm diameter) separated to four vertical segments (0–2.5 cm, 2.5–5 cm, 5–7.5 cm  
219 and 7.5–10 cm) in the last week of August 2020. Identical vertical segments were pooled per plot.  
220 We used the seedling emergence method with bulk reduction by ter Heerdt et al. (1996).  
221 Concentrated samples were spread on the surface of pots filled with steam-sterilised potting soil.  
222 The samples were regularly watered and checked for emerged seedlings. Seedlings were identified  
223 and removed; unidentified seedlings were transplanted and grown until the final identification.  
224 Emergence lasted about 11 weeks in the autumn of 2020, from 28<sup>th</sup> August until 15<sup>th</sup> November. At  
225 the end of the germination period, we identified all seedlings at the highest possible taxonomic  
226 level. As we conducted a preliminary germination experiment in the spring, we were able to  
227 distinguish the seedlings of *Sporobolus cryptandrus* from the seedlings of native C3 grasses at a  
228 very early stage. Other C4 grasses typical in the region were almost absent from the plots (e.g.,  
229 *Cynodon dactylon*) or were present with low density only in seed banks and flowered already very  
230 early in the pots (*Eragrostis minor*). Only a small fraction of the seedlings perished before  
231 identification to a respective family, genus or species (8 individuals, less than 0.4% of all seedlings,  
232 omitted from analyses). Altogether 28 taxa were identified at the species level. We were not able to  
233 identify non-septate *Juncus* (1 seedling, treated as *J. conglomeratus/effusus*), or *Epilobium*  
234 seedlings (3 seedlings, *Epilobium* sp.) on the species level, and we also pooled the seedlings of  
235 *Arenaria leptoclados* and *A. serpyllifolia* as *A. leptoclados*. Seedlings of short-lived small *Veronica*  
236 species (*V. polita*, *V. triphyllos*, *V. verna*) were pooled as *Veronica* sp. (altogether 65 individuals).  
237 For some graminoid seedlings we were able to identify them only at the family level – Poaceae

Sand dropseed - a new pest in Eurasia

238 (altogether 38 individuals – these were most likely the seedlings of *Poa angustifolia* or *Lolium*  
239 *perenne*).

240

## 241 **Germination experiment**

242

243 A greenhouse experiment was conducted to test the effects of increasing seed burial depth (0, 0.5  
244 and 1 cm soil) and increasing levels of litter cover (0, 150 and 300 g/m<sup>2</sup>) and their interaction on the  
245 germination potential of *S. cryptandrus* in a full-factorial design with nine treatments in five  
246 replications (resulting in 45 pots total). For the selection of the soil and litter cover thicknesses we  
247 used a modified version of the experimental setup published by Sonkoly et al. (2020). *S.*  
248 *cryptandrus* seeds were collected in 2019 and dry-stored at room temperature (20–25 °C) in the  
249 seed collection of the Department of Ecology at the University of Debrecen. A total of 45 pots filled  
250 with steam-sterilized potting soil were used in the experiment and 25 *Sporobolus* seeds were spread  
251 out evenly on the surface of each pot (in total 1125 seeds were sown). We used the same sterilized  
252 potting soil and the litter of *Festuca rupicola* for covering the seeds. The germination experiment  
253 lasted ten weeks from 26<sup>th</sup> March until 27<sup>th</sup> May 2020. The seedlings were regularly counted and  
254 removed. Only those seedlings were counted which appeared at the surface of the treatment. We  
255 registered the number of established seedlings weekly and removed and registered the perished ones  
256 – so we were able to calculate the seedling survival rates for the entire experiment.

257

## 258 **Statistical analyses**

259

260 We calculated species richness (S, number of species), Shannon diversity (H, based on ln) and  
261 evenness scores (following Pielou (1975) where Evenness = H/log(S), and H refers for Shannon  
262 diversity and S for species richness) to compare vegetation and seed bank data of plots with  
263 increasing cover of *Sporobolus*. The effect of site, *Sporobolus* cover and their interaction on the

## Sand dropseed - a new pest in Eurasia

264 selected vegetation characteristics were analysed using two-way ANOVA, where the fixed factors  
265 were ‘sampling site’ and ‘*Sporobolus* cover’, and dependent variables were species richness,  
266 Shannon diversity, and evenness with and without the inclusion of *Sporobolus* and its abundances.  
267 The effect of litter cover, soil burial and their interaction on the number of germinated seedling and  
268 survival rates were analysed by two-way ANOVA, where the fixed factors were ‘litter cover’ and  
269 ‘soil burial depth’. The effect of ‘*Sporobolus* cover’ and ‘soil layer’ (included as fixed factors) on  
270 the species richness, Shannon diversity and evenness (dependent variables) were analysed by a two-  
271 way ANOVA.

272

273 The vegetation composition of the five sites were compared with a PCA ordination, where the main  
274 data matrix was the species composition of the plots with different *Sporobolus* cover (at each mass  
275 locality site. Altogether 10 plots of the same *Sporobolus* cover group were pooled, each cover group  
276 was represented by one pooled plot, in total four pooled plots per site), and the secondary matrix  
277 contained the selected soil parameters (one pooled sample per *Sporobolus* cover group, in total four  
278 pooled samples per site, the means of soil characteristics are shown in Table 2).

279

## 280 **Results**

281

### 282 *Habitat preference of *Sporobolus cryptandrus* in Hungary*

283

284 During the detailed field surveys more than 620 individual locations of the species were detected in  
285 Central and East Hungary, with most of the locations in the Kiskunság region. In the city of  
286 Debrecen, the species was detected in variously degraded and frequently mown urban grasslands  
287 situated between blocks of flats, or at road verges, parking lots, and tramlines. In contrast to the  
288 urban localities in Debrecen, in the Kiskunság region all *Sporobolus* stands were found in rural  
289 landscapes. A remarkable amount of the detected *Sporobolus* populations occur in dry sandy

## Sand dropseed - a new pest in Eurasia

290 habitats, mainly in disturbed or strongly degraded stands of open sand grasslands, or in closed,  
291 desiccated interdune grasslands which typically originate from more wet interdune *Molinia*  
292 meadows. Large populations were found along artificial linear landscape elements, such as dirt  
293 roadsides, motocross trails, and ploughed fire buffer zones. Furthermore, the species colonised  
294 sandy areas ploughed recently (edges of young tree plantations) or during the last three decades. We  
295 also found the species in old-fields of various age, both young old-fields characterized by short-  
296 lived weeds (e.g., *Anthemis ruthenica*, *Ambrosia artemisiifolia* or *Bromus tectorum*) and old old-  
297 fields already dominated by perennial grasses (e.g., *Festuca pseudovina*, *Cynodon dactylon* and  
298 *Bothriochloa ischaemum*). Further land use types with intense disturbance were also found to  
299 facilitate the spread of *Sporobolus cryptandrus*, as we found populations in grasslands formerly or  
300 recently overgrazed by sheep, and in the close vicinity of game feeders. Invasion of *Sporobolus* was  
301 also detected in grasslands that were burned 10–20 years ago, and successfully regenerated since  
302 then (apart from the presence of *Sporobolus*) and consist of the species of natural sandy grasslands  
303 (e.g., *Festuca vaginata*, *Koeleria glauca*, *Stipa pennata*, *Alkanna tinctoria*, *Dianthus serotinus* and  
304 *Silene otites*). Moreover, *Sporobolus cryptandrus* spreads in drought-affected stands of open sandy  
305 grasslands co-dominated by *Festuca vaginata* and *Stipa pennata*. The southern slopes of sand dunes  
306 are typical drought-affected habitats where the destruction of the *Festuca vaginata* tussocks is  
307 typical due to severe droughts, and the *Sporobolus* can take its place. *Sporobolus* appeared in the  
308 dried-out stands of closed interdune grasslands and in the northern part of the Kiskunság (near  
309 Kecskemét) we found it also in the dried-out meadow steppes (with meadow soils). Although  
310 primary incursion of *Sporobolus* into natural habitats has not been detected, we found that it can  
311 spread to natural open sandy grasslands from the neighbouring disturbed, invaded habitats, where it  
312 potentially threatens rare sandy species such as *Dianthus diutinus*, which is a priority species of  
313 European community interest. An important observation is that the shade-tolerance of *Sporobolus*  
314 *cryptandrus* is rather low; in the shaded parts of the invaded patches only sparse population of  
315 *Sporobolus* were found.

## Sand dropseed - a new pest in Eurasia

316

317 *Soil and vegetation characteristics of the selected sites*

318

319 Soil analyses of the five study sites revealed that the soil pH ranged between 6.16-7.41, the lowest  
320 score in Debrecen (acidic sand deposits) and higher scores were typical in the sample sites of the  
321 Kiskunság region (calcareous sand deposits). The physical soil texture type expressed by soil  
322 compactness ranged from sand to clay loam, with some sites with a higher load of nutrients,  
323 especially in phosphorous (D and KT sites) and potassium (D, KT, and A sites) (Table 2).

324

325 Studying the selected five sites, we found that both increasing *Sporobolus* cover, and the sampling  
326 site significantly affected most of the studied variables of vegetation with or without the inclusion  
327 of the *Sporobolus* cover in the calculations (Table 3). In all sites, we detected an increase in species  
328 richness, Shannon diversity and evenness scores from cover group I to II and then a rapid decline  
329 was detected for all variables (Figures 3, 4, and 5). There were, however, highly site-dependent  
330 differences in the magnitude of this effect, but in most cases no interaction between *Sporobolus*  
331 cover and sampling site was detected (Table 3). This pattern was especially distinct for Shannon  
332 diversity and evenness scores (Figures 4 and 5). These trends were clearly shown also on the  
333 ordination diagram (Figure 4). The ordination clearly revealed that sites with markedly different  
334 vegetation composition will be “homogenised” by the increase of the cover of *Sporobolus*, and  
335 almost all other species were negatively affected by the high cover of the invasive species (Figure  
336 6). Detailed vegetation compositional data of plots on which Figure 6 was based is summarised in  
337 Electronic Appendix 2.

338

339 *Seed banks*

340

## Sand dropseed - a new pest in Eurasia

341 Altogether 2,132 seedlings of 32 taxa were germinated from the samples of soil seed banks,  
342 including in total 320 seedlings of *Sporobolus cryptandrus*. Beside of *Sporobolus*, *Arenaria*  
343 *leptoclados/serpyllifolia*, *Portulaca oleracea*, *Potentilla argentea*, *Digitaria sanguinalis* and  
344 *Cerastium semidecandrum* were the most frequent species in the seed bank with 508, 492, 200, 153  
345 and 104 seedlings, respectively. These six taxa provided more than 83% of the total seed bank (see  
346 more details in Electronic Appendix 3). The seed density of *Sporobolus* ranged from 1,114 to 3,077  
347 seeds/m<sup>2</sup> considering the pooled seed bank data for the 30 cores (0-10 cm layer) per site (Electronic  
348 Appendix 3). Increasing *Sporobolus* cover negatively affected the total seedling number of other  
349 species, and also the species richness, Shannon diversity and evenness of the seed bank (Table 4,  
350 Figures 8, 9 and 10). The cover of *Sporobolus* did not significantly affect the seed bank density of  
351 *Sporobolus* itself; we detected soil seed banks of *Sporobolus* even in the closely located reference  
352 stands with no cover of the species. The soil layer significantly affected almost all seed bank  
353 characteristics, with decreasing scores towards to the deeper soil layers (Figures 8, 9 and 10).  
354 Seedlings of *Sporobolus* emerged from all studied soil layers (Figure 7). Only a few cases showed  
355 interaction between the soil layers and *Sporobolus* cover – in case of the seed bank density of  
356 *Sporobolus* and evenness (Table 4).

357

## 358 *Germination characteristics*

359

360 Nearly 24% of all seeds germinated during the experiment. The highest total germination rate was  
361 detected in pots with low soil burial depth and no litter cover (Figure 11). Both litter and soil cover  
362 significantly affected the total germination rate and the seedling survival in the germination  
363 experiment, but there was no interaction between these factors (Table 5). The total germination rate  
364 was the lowest in pots with low to high burial depth and high litter cover, but even from these pots  
365 some seedlings appeared at the surface and were established until the end of the project.  
366 Considering all litter treatments, the highest total germination rate was detected with low soil cover

Sand dropseed - a new pest in Eurasia

367 and not in the case of no soil cover. Seedling survival rates showed high fluctuations in most  
368 treatments, even in treatments with relatively high survival rates, there were pots with relatively low  
369 survival rates. The lowest mean survival rates were detected for the treatments no soil/no litter and  
370 high soil/high litter cover (Figure 11).

371

## 372 **Discussion**

373

### 374 *Distribution and invasion of Sporobolus cryptandrus*

375

376 In recent decades, spread of several non-native *Sporobolus* species was detected in Europe. Beside  
377 *Sporobolus cryptandrus*, the establishment and intensive spread of naturalised populations of *S.*  
378 *neglectus* and *S. vaginiflorus* was reported from the Mediterranean regions and from dry regions of  
379 the eastern part of Central Europe (Hohla et al. 2015, Király & Hohla 2015, Jogan 2017, Englmaier  
380 & Wilhelm 2018). Rapid spread and expansion in the last decade were detected for both species  
381 along regularly mown margins of roads and motorways, but, because of the circumstances of their  
382 establishment, they constitute a lower threat to natural vegetation than *Sporobolus cryptandrus*. As  
383 in the case of *S. neglectus* and *S. vaginiflorus*, the current distribution map of *S. cryptandrus* clearly  
384 shows that the naturalised populations of this species are confined to the European Mediterranean or  
385 to regions of Eastern Central and Eastern Europe characterised by arid, at least moderately  
386 continental climate. Only occasional establishment of the species was detected in more humid  
387 regions of Central and Western Europe (Figure 2). In contrast to the other two species, spread of *S.*  
388 *cryptandrus* is not limited to road margins and the vicinity of ruderal sites (Hohla et al. 2015, but  
389 occasional establishment can occur also in isolated locations - see also Király 2016), but subjects  
390 large areas characterised by natural, semi-natural and degraded dry-grassland vegetation (this paper  
391 and Török & Aradi 2017). In the Kiskunság region, the species has also established in relatively  
392 undisturbed sandy grasslands. It is especially alarming that the species has established also in steppe

## Sand dropseed - a new pest in Eurasia

393 grasslands in the Ukrainian and Russian steppe regions (Demina et al. 2018). As *S. cryptandrus* is  
394 considered to be one of the most drought-resistant species of short-grass prairies (see for example  
395 Tilley et al. 2009), further potential occurrences and its spread can be forecasted in dry sand regions  
396 or degraded rocky habitats of Europe due to the ongoing climate change.

397

### 398 *Effect of S. cryptandrus on the vegetation and seed banks of sand grasslands*

399

400 Species-specific information on the aspects of the seed bank formation and early establishment  
401 patterns of an invasive species is crucial for developing strategies for its suppression and for the  
402 prevention of its further spread (Gioria et al. 2012, Sonkoly et al. 2020). We found that increasing  
403 cover of *S. cryptandrus* decreases the species richness and abundance of subordinate species both in  
404 the vegetation and seed banks. We also found a rather weak but facilitative effect of the low-  
405 abundance establishment of *S. cryptandrus* on the species richness of other species both in the  
406 vegetation and seed banks of the subjected grasslands. Similar facilitative effects were detected by  
407 Kelemen et al. (2015) in the case of the native species *Festuca pseudovina*, a community dominant  
408 perennial grass characteristic in dry alkali grasslands. The most likely explanation of the  
409 phenomenon could be that the establishment of the drought-tolerant species also mitigates the  
410 microclimatic extremities of the dry habitat and thus facilitate the establishment and survival of  
411 others (e.g., Eviner 2004) – especially that of short-lived species in the habitat (e.g., *Arenaria*  
412 *leptoclados*, *Portulaca oleracea* or *Cerastium semidecandrum*). However, this ‘nurse’ effect was  
413 not detected in plots with a high cover of the species. The facilitative effect of dominant perennials  
414 (including, in our case, *Sporobolus*) mostly occurs through the facilitation of the germination and  
415 early establishment of subordinate species, but this positive interaction can turn into competition for  
416 light or space (Liancourt et al. 2005, Le Roux et al. 2013). The sign of the interaction between plant  
417 species is also density-dependent; a low density of a facilitator species can have positive effects, but  
418 it can turn to negative interaction above a certain density of the species (Kelemen et al. 2019). This



## Sand dropseed - a new pest in Eurasia

419 is in line with our findings as the richness and abundance of subordinated species in the vegetation  
420 and seed banks was higher in plots with a low density of *Sporobolus* than in plots without  
421 *Sporobolus*, but a higher density of the species had an overall negative effect.

422

423 Viable seeds of the species were detected from all soil layers. This indicates that the species is able  
424 to form a persistent seed bank as also indicated by similar results from natural prairie communities  
425 in North America (Coffin & Lauenroth 1989, Pérez et al. 1998, Clements et al. 2007). However, the  
426 seed bank density was rather low in the three deeper soil layers and increasing *Sporobolus*  
427 abundance in the vegetation only increased *Sporobolus* seed bank density in the uppermost layer.  
428 This may be an indirect evidence of the ongoing spread and quite recent establishment of the  
429 species in the study site (i.e., only a small number of seeds were able to reach the deeper soil layers  
430 in the limited time). The detected seed density scores for *Sporobolus* are comparable to some  
431 studies in native prairie habitats where high densities of the species were typical (up to 3,414  
432 seeds/m<sup>2</sup>, Clements et al. 2007). It cannot be excluded, however, that the frequent mowing at the  
433 sampled urban grassland occurring before seed maturation affects the seed production and seed  
434 bank accumulation of the species in spite of its ability of late and secondary flowering. This latter  
435 issue should be clarified later when the seed banks of all sites will be assessed.

436

## 437 *Effect of litter and soil cover on the germination of the species*

438

439 We found that germination of *Sporobolus cryptandrus* was negatively affected by soil burial and  
440 litter cover, but there was no interaction between the two factors. Some seedlings emerged in pots  
441 even with the highest litter and soil cover levels. These results were in line with most findings of  
442 Sonkoly et al. (2020) where the germination of 11 invasive species were tested. Mirroring also the  
443 results of the latter study, the small-seeded *S. cryptandrus* had the highest seed germination rates  
444 with 0.5 cm soil burial depth with no litter cover. The detected seed germination rates of *Sporobolus*

## Sand dropseed - a new pest in Eurasia

445 were rather low compared to some other invasive grasses, but quite similar and even a bit higher  
446 compared to the formerly reported germination/viability rates after warm stratification (Sartor &  
447 Malone 2010). As seeds were collected in previous years, these results suggest that the seeds can  
448 survive even longer periods of dry storage without the significant loss of their viability.

449

## 450 *Open research questions and conservation outlook*

451

452 By definition, those species can be considered as transformer invasive species “that change the  
453 character, condition, form, or nature of ecosystems” (Richardson et al. 2000). Based on our results,  
454 *Sporobolus cryptandrus* can be considered as a transformer invasive species, whose spread poses a  
455 high risk for dry sand and steppe grasslands in Eurasia, especially in the steppe climatic zone.  
456 However, to develop an appropriate strategy for its suppression we need further information on the  
457 following crucial aspects of its life history, population dynamics and spread. First, in depth genetic  
458 analyses (e.g., a phylogeographic study using a genomic method) are needed to clarify the likely  
459 origin of the established populations and to interpret the means of its long-distance dispersal making  
460 it possible to evaluate the pace of its spread and population growth. Second, we need further  
461 information on its competitive ability including not only data on the aboveground competition but  
462 also information of its allelopathic ability and root competition. Third, it would be necessary to  
463 assess the seed banks of sites with different site history and establishment time of the species to  
464 evaluate the density and the development speed of its soil seed banks. Lastly, for its effective  
465 suppression it is vital to study its possible enemies in its native area and to assess the capacity of  
466 traditional management types (grazing or mowing) to control the species, not excluding the  
467 possibility of its eradication using mechanical (e.g., shading) and/or chemical methods.

468

## Sand dropseed - a new pest in Eurasia

469

## 470 Acknowledgements

471

472 PT, ZB and CT were supported by NKFIH (K119225, K124796 and PD132131, respectively) and  
473 the ‘Momentum’ Program of the Hungarian Academy of Sciences during manuscript writing.

474

## 475 References

476

477 Alekseev Y. E., Pavlov V. N. & Sagalaev V. A. (1996) *Sporobolus cryptandrus* (Torr.) Gray  
478 (Gramineae): new adventitious species in the flora of Russia and former USSR. [новый  
479 адвентивный вид во флоре России и бывшего СССР] – *Byulleten' Moskovskogo*  
480 *Obshchestva Ispytatelei Prirody Otdel Biologicheskii* 101: 98–102.

481 Britton N. L. & Brown A. (1970) *An Illustrated Flora of the Northern United States and Canada*,  
482 Vol. 1: Ferns to Buckwheat. – Dover Publications

483 Brooks K. J., Setterfield S. A. & Douglas M. M. (2010) Exotic grass invasions: Applying a  
484 conceptual framework to the dynamics of degradation and restoration in Australia's tropical  
485 savannas. – *Restoration Ecology* 18: 188–197.

486 Brown H. R. (1943) Growth and seed yields of native prairie plants in various habitats of the  
487 mixed-prairie. – *Transactions, Kansas Academy of Science* 46: 87–99.

488 Byers J. E., Wright J. T. & Gribben P. E. (2010) Variable direct and indirect effects of a  
489 habitat-modifying invasive species on mortality of native fauna. – *Ecology* 91: 1787–1798.

490 Catford J. A., Vesk P. A., Richardson D. M. & Pysek P. (2011) Quantifying levels of biological  
491 invasion: towards the objective classification of invaded and invadable ecosystems. – *Global*  
492 *Change Biology* 18: 44–62.

493 Clements D. R., Krannitz P. G. & Gillespie S. M. (2007) Seed bank responses to grazing history by  
494 invasive and native plant species in a semi-desert shrub-steppe environment. – *Northwest*  
495 *Science* 81: 37–49.

496 Coffin D. P. & Lauenroth W. K. (1989) Spatial and temporal variation in the seed bank of a  
497 semiarid grassland. – *American Journal of Botany* 76: 53–58.

498 Curto M. (2012) *Sporobolus cryptandrus*, in Jepson Flora Project (eds.) Jepson eFlora,  
499 [https://ucjeps.berkeley.edu/eflora/eflora\\_display.php?tid=45299](https://ucjeps.berkeley.edu/eflora/eflora_display.php?tid=45299), accessed on March 26, 2021.

500 D'Antonio C. M. & Vitousek P. M. (1992). Biological invasions by exotic grasses, the grass/fire  
501 cycle, and global change. – *Annual Review of Ecology and Systematics* 23: 63–87.

502 Demina O. N., Rogal' L. L. & Mayorov S. R. (2016) *Sporobolus cryptandrus* (Torr.) A. Gray  
503 (Gramineae) – an invasive species of flora in the Rostov region [In Russian, Демина  
504 О.Н.,Рогаль Л.Л.,Майоров С.Р., *Sporobolus cryptandrus*(Torr.) A. Gray (Gramineae) –  
505 инвазионный вид флоры на территории Ростовской области] – “*Living and Bioinert*  
506 *Systems*” 15: article 7.

507 Demina O. N., Rogal' L. L. & Mayorov S. R. (2018) Resettlement of *Sporobolus cryptandrus*  
508 (Torr.) A. Gray (Gramineae) and its phytocenotic environment [in Russian, Демина, О. Н.,  
509 Рогаль, Л. Л. & Майоров, С. Р. 2018: Расселение *Sporobolus cryptandrus* (Torr.) A. Gray  
510 (Gramineae) и его фитоценотическое окружение] – *Phytodiversity of Eastern Europe* 12: 113–  
511 117.

## Sand dropseed - a new pest in Eurasia

- 512 Dflor (2021): <https://deutschlandflora.de/dflor/de/support/haeufig-gestellte-fragen>; Accessed:  
513 Accessed: 31.03.2021
- 514 Edgar E. & Connor H. E. (2000) Flora of New Zealand Vol. V. Gramineae. – Manaaki Whenua  
515 Press, Lincoln, New Zealand.
- 516 Englmaier P. & Wilhalm T. (2018) Alien grasses (Poaceae) in the flora of the Eastern Alps:  
517 Contribution to an excursion flora of Austria and the Eastern Alps. – *Neilreichia* 9: 177–245.
- 518 Erdős L., Aradi E., Bátori Z. & Tölgyesi C. (2018) Adatok Magyarország flórájához és  
519 vegetációjához III. – *Kitaibelia* 23: 197–206.
- 520 Eviner V. T. (2004) Plant traits that influence ecosystem processes vary independently among  
521 species. – *Ecology* 85: 2215–2229.
- 522 Fusco E. J., Finn J. T., Balch J. K., Nagy C. & Bradley B. A. (2019) Invasive grasses increase fire  
523 occurrence and frequency across US ecoregions. – *Proceedings of the National Academy of*  
524 *Sciences of the United States of America* 116: 23594–23599.
- 525 Gioria M., Pyšek P. & Moravcová L. (2012) Soil seed banks in plant invasions: promoting species  
526 invasiveness and long-term impact on plant community dynamics. – *Preslia* 84: 327–350.
- 527 Gouz G. V. & Timoshenkova V. V. (2017) The first record of *Sporobolus cryptandrus* (Poaceae)  
528 for Ukraine and new records for southeastern Ukraine from Triokhizbensky Steppe. [in  
529 Ukrainian: Гузь, Г. В. & Тимошенкова, В. В. 2017: Первая в Украине находка *Sporobolus*  
530 *cryptandrus* (Poaceae) и новые для флоры юговостока Украины виды с территории  
531 „Трѣхизбенской степи”] – *Ukrainian Botanical Journal* 74: 64–70.
- 532 Hitchcock C. L., Cronquist A., Ownbey M. & Thompson J. W. (1969) Vascular Plants of the  
533 Pacific Northwest. Part 1: Vascular cryptogams, gymnosperms, and monocotyledons. –  
534 University of Washington Press, Seattle, WA.
- 535 Hohla M., Diewald W. & Király G. (2015) *Limonium gmelini* – eine Steppenpflanze an  
536 österreichischen Autobahnen sowie weitere Neuigkeiten zur Flora Österreichs. – *Stapfia* 103:  
537 127–150.
- 538 Holub J. & Jehlík V. (1987) *Sporobolus cryptandrus* v Československu. [*Sporobolus cryptandrus* in  
539 Czechoslovakia]. – *Preslia* 59: 117–134.
- 540 Hurka H., Friesen N., Bernhardt K.-G., Neuffer B., Smirnov S.V., Shmakov A.I., Blattner F.R.  
541 (2019) The Eurasian steppe belt: Status quo, origin and evolutionary history. *Turczaninowia*, 22:  
542 5–71.
- 543 IPCC (2013) Climate Change 2013: The Physical Science Basis. Contribution of Working Group I  
544 to the Fifth Assessment Report of the Intergovernmental Panel on Climate Change Cambridge  
545 University Press, Cambridge, United Kingdom and New York, NY, USA.
- 546 Jarić I., Heger T., Castro Monzon F., Jeschke J. M., Kowarik I., McConkey K. R., Pyšek P.,  
547 Sagouis A. & Essl F. (2019) Crypticity in Biological Invasions. – *Trends in Ecology & Evolution*  
548 34: 291–302.
- 549 Jogan N. (2017) Spread of *Sporobolus neglectus* and *S. vaginiflorus* (Poaceae) in Slovenia and  
550 neighbouring countries. – *Botanica Serbica* 41: 249–256.
- 551 Johnston W. H. (1996) The place of C4 grasses in temperate pastures in Australia. – *New Zealand*  
552 *Journal of Agricultural Research* 39: 527–540.
- 553 Kelemen A., Török P., Valkó O., Deák B., Tóth K. & Tóthmérész B. (2015) Both facilitation and  
554 limiting similarity shape the species coexistence in dry alkali grasslands. – *Ecological*  
555 *Complexity* 21: 34–38.
- 556 Kelemen A., Valkó O., Kröel-Dulay G., Deák B., Török P., Tóth K., Migléc T. & Tóthmérész B.  
557 (2016) The invasion of common milkweed (*Asclepias syriaca*) in sandy old-fields – is it a threat  
558 to the native flora? – *Applied Vegetation Science* 19: 218–224.

## Sand dropseed - a new pest in Eurasia

- 559 Kelemen A., Tölgyesi C., Valkó O., Deák B., Miglécz T., Fekete R., Török P., Balogh N. &  
560 Tóthmérész, B. (2019) Density-dependent plant–plant interactions triggered by grazing. –  
561 *Frontiers in Plant Science* 10: 876.
- 562 van Kleunen M., Pyšek P., Dawson W., Essl F., Kreft H., Pergl J., Weigelt P., Stein A., Dullinger  
563 S., König C., Lenzner B., Maurel N., Moser D., Seebens H., Kartesz J., Nishino M., Aleksanyan  
564 A., Ansong M., Antonova L. A., Barcelona L. A., Breckle S. W., Brundu G., Cabezas F. J.,  
565 Cárdenas D., Cárdenas-Toro J., Castaño N., Chacón E., Chatelain C., Conn B., de Sá Dechoum  
566 M., Dufour-Dror J.-M., Ebel A. L., Figueiredo E., Fragman-Sapir O., Fuentes N., Groom Q. J.,  
567 Henderson L., Inderjit, Jogan N., Krestov P., Kupriyanov A., Masciadri S., Meerman J.,  
568 Morozova J., Nickrent D., Nowak A., Patzelt A., Pelser P. B., Shu W.-S., Thomas J., Uludag A.,  
569 Velayos M., Verkhosina A., Villaseñor J. L., Weber E., Wieringa J. J., Yazlık A., Zeddäm A.,  
570 Zykova E. & Winter M. (2019) The Global Naturalized Alien Flora (GloNAF) database. –  
571 *Ecology* 100: e02542.
- 572 Király G. (2016) An invader at the edge of the World: *Sporobolus neglectus* (Poaceae) discovered  
573 at a remote locality in Hungary. – *Studia Botanica Hungarica* 47: 335–344.
- 574 Király G. & Hohla M. (2015) New stage of the invasion: *Sporobolus vaginiflorus* (Poaceae) reached  
575 Hungary. – *Studia Botanica Hungarica* 46: 149–155.
- 576 Kuvaev A. V. & Stepanova N. Yu. (2014) Floristic records from Kalmyk republic. part 4. –Byull.  
577 MOIP. Otd. biol. 119: 71–72.
- 578 Lackschewitz K. (1991) Vascular Plants of West-Central Montana - Identification Guidebook. –  
579 U.S. Department of Agriculture, Forest Service, Intermountain Research Station, Ogden, UT.
- 580 Le Roux P. C., Shaw J. D. & Chown S. L. (2013) Ontogenetic shifts in plant interactions vary with  
581 environmental severity and affect population structure. – *New Phytologist* 200: 241–250.
- 582 Lesica P. (2012) Manual of Montana Vascular Plants – MRIT Press
- 583 Leuschner C., & Ellenberg H. (2017) Ruderal communities on drier soils. – In: Leuschner C., &  
584 Ellenberg H. (eds), *Ecology of Central European Non-Forest Vegetation: Coastal to Alpine,*  
585 *Natural to Man-Made Habitats* (pp. 765-778). Springer, Cham.
- 586 Liancourt P., Callaway M. & Michalet R. (2005) Stress tolerance and competitive-response ability  
587 determine the outcome of biotic interactions. – *Ecology* 86: 1611–1618.
- 588 Maltsev M. V. & SagalaeV V. A. (2018) Community *Sporobolus cryptandrus* (Torr.) A. Gray in the  
589 Northern Part of Volga-Akhtuba Floodplain. [In Russian, Сообщества *Sporobolus cryptandrus*  
590 (Torr.) A. Gray на территории северной части Волго-Ахтубинской поймы] – *Natural*  
591 *Systems and Resources* 8: 5–14.
- 592 Molnár C., Bauer N., Csathó AI, Szigeti V. & Schmidt D. (2020) Az *Oenothera pycnocarpa* Atk. et  
593 Bartl. Magyarországon, és kiegészítések néhány idegenhonos faj hazai elterjedéséhez. –  
594 *Botanikai Közlemények* 107: 177–202.
- 595 Mojzes A., Ónodi G., Lhotsky B., Kalapos T. & Kröel-Dulay G. (2020) Experimental drought  
596 indirectly enhances the individual performance and the abundance of an invasive annual weed. –  
597 *Oecologia* 193: 571–581.
- 598 Murr J. (1902) Beiträge zur Flora von Tirol und Vorarlberg. XIV – *Deutsche Bot. Monatsschr.* 20:  
599 117–123.
- 600 NMBC (2021): National Mediterranean Botanical Conservatory (Cyril Cottaz), Accessed:  
601 Accessed: 31.03.2021
- 602 Nobis M., Ebel A. L., Nowak A., Paszko B., Bobrov A. A., Kotukhov Y. A., Kupriyanov A. N.,  
603 Nobis A., Zalewska-Gałosz J., Olonova M. V., Verloove F., Chen W., Kushunina M., Kwolek  
604 D., Lashchinskiy N. N., Piwowarczyk R., Sukhorukov A. P., Nowak S., Plášek V. & Pliszko A.  
605 (2015). Contribution to the flora of Asian and European countries: new national and regional  
606 vascular plant records, 4. – *Acta Botanica Gallica*, 162: 301–316.

## Sand dropseed - a new pest in Eurasia

- 607 Ogle D., John L. St., Stannard M. & Holzworth L. (2009) Grass, grass-like, forb, legume, and  
608 woody species for the Intermountain West. – USDA-NRCS, ID-TN 24. Boise ID.
- 609 Pérez C. J., Waller S. S., Moser L. E., Stubbendieck J. L. & Steuter A. A. (1998) Seedbank  
610 characteristics of a Nebraska sandhills prairie. – *Journal of Range Management* 51: 55–62.
- 611 Pielou E. C. (1975) *Ecological Diversity*. – Wiley InterScience, New York
- 612 Polgár S. (1933) Neue Beiträge zur Adventivflora von Győr (Westungarn) IV. – *Magyar Botanikai*  
613 *Lapok* 32: 71–77.
- 614 Pyšek P., Pergl J., Essl F., Lenzner B., Dawson W., Kreft H., ... & Kleunen, M. V. (2017)  
615 *Naturalized alien flora of the world*. – *Preslia* 89: 203–274.
- 616 Pyšek P., Hulme P. E., Simberloff D., Bacher S., Blackburn T. M., Carlton J. T., Dawson W., Essl  
617 F., Foxcroft L. C., Genovesi P., Jeschke J. M., Kühn I., Liebhold A. M., Mandrak N. E.,  
618 Meyerson L. A., Pauchard A., Pergl J., Roy H. E., Seebens H., van Kleunen M., Vilà M.,  
619 Wingfield M. J. & Richardson D. M. (2020) Scientists' warning on invasive alien species. –  
620 *Biological Reviews* 95: 1511–1534.
- 621 Randall (2017) *Global Compendium of Weeds*. 3rd edition. – Perth, Australia, 3659 pp.
- 622 Richardson D. M., Pyšek P., Rejmánek M., Barbour M. G., Panetta F. D. & West C. J. (2000)  
623 *Naturalization and invasion of alien plants: concepts and definitions*. – *Diversity and Distribution*  
624 6: 93–107.
- 625 Romani E., Banfi E. & Galasso G. (2015) *Informatore Botanico Italiano* 47(1): 77–90.
- 626 Rasmussen J. A. & Rice E. L. (1971) Allelopathic effects of *Sporobolus pyramidatus* on  
627 vegetational patterning. – *The American Midland Naturalist* 86: 309–326.
- 628 Richardson D. M., Pyšek P., Rejmánek M., Barbour M. G., Panetta F. D. & West C. J. (2000)  
629 *Naturalization and invasion of alien plants: concepts and definitions*. – *Diversity and*  
630 *Distributions* 6: 93–107.
- 631 Ryves T. B. (1988) Supplementary list of wool-alien grasses recorded from Blackmoor, North  
632 Hants., 1959–1976 – *Watsonia*. 17: 76–79.
- 633 Sani A., D'Antraccoli M. & Peruzzi L. (2015) *Sporobolus cryptandrus* (Torr.) A. Gray (Poaceae) in  
634 Raab-Straube E., Raus T. Euro+Med-Checklist Notulae, 4 – *Willdenowia* 45: pp. 125.
- 635 Sartor C. E. & Malone L. (2010) A plurality of causal mechanisms explains the persistence or  
636 transience of soil seed banks. – *Journal of Arid Environments* 74: 303–306.
- 637 Simon B. K. & Jacobs S. W. (1999) Revision of the genus *Sporobolus* (Poaceae, Chloridoideae) in  
638 Australia. – *Australian Systematic Botany* 12: 375–448.
- 639 Sonkoly J., Valkó O., Balogh N., Godó L., Kelemen A., Kiss R., Miglécz T., Tóth E., Tóth K.,  
640 Tóthmérész B. & Török P. (2020) Germination response of invasive plants to soil burial depth  
641 and litter accumulation is species specific. – *Journal of Vegetation Science* 31: 1079–1087.
- 642 Sparrius, L., van Heeswijk J., Dirkse G. M. & Verhofstad M. J. J. M. (2019) FLORIVON v11.6.  
643 FLORON Plant Conservation Nederland. Dataset/Occurrence.  
644 [http://www.verspreidingsatlas.nl:8085/ipt/resource?r=florivon&v=11.6;](http://www.verspreidingsatlas.nl:8085/ipt/resource?r=florivon&v=11.6) Accessed:  
645 31.03.2021
- 646 Thellung A. (1919) Beiträge zur Adventivflora der Schweiz (III). – *Vierteljahresschr. Naturforsch.*  
647 *Ges. Zürich*. 64: 684–815.
- 648 Tilley D., St. John L. & Ogle D. (2009) Plant guide for sand dropseed (*Sporobolus cryptandrus*). –  
649 USDA-Natural Resources Conservation Service, Idaho Plant Materials Center. Aberdeen, ID.
- 650 Tölgyesi C., Török P., Hábcenyus A. A., Bátori Z., Valkó O., Deák B., Tóthmérész B., Erdős L.,  
651 Kelemen A. (2020) Underground deserts below fertility islands? Woody species desiccate lower  
652 soil layers in sandy drylands. – *Ecography* 43: 848–859.

## Sand dropseed - a new pest in Eurasia

- 653 Török P. & Aradi E. (2017) A new potentially invasive grass, sand dropseed (*Sporobolus*  
654 *cryptandrus*) discovered in sandy areas of Hungary – A call for information on new localities. –  
655 Bulletin of the Eurasian Dry Grassland Group 35: 24–25.
- 656 Wan C., Sosebee R. E. & McMichael B. L. (1993) Soil water extraction and photosynthesis in  
657 *Gutierrezia sarothrae* and *Sporobolus cryptandrus*. – Journal of Range Management 46: 425–430.
- 658 Williams D. G. & Brauch Z. (2000) African grass invasion in the Americas: ecosystem  
659 consequences and the role of ecophysiology. – Biological Invasions 2: 123–140.
- 660

## Sand dropseed - a new pest in Eurasia

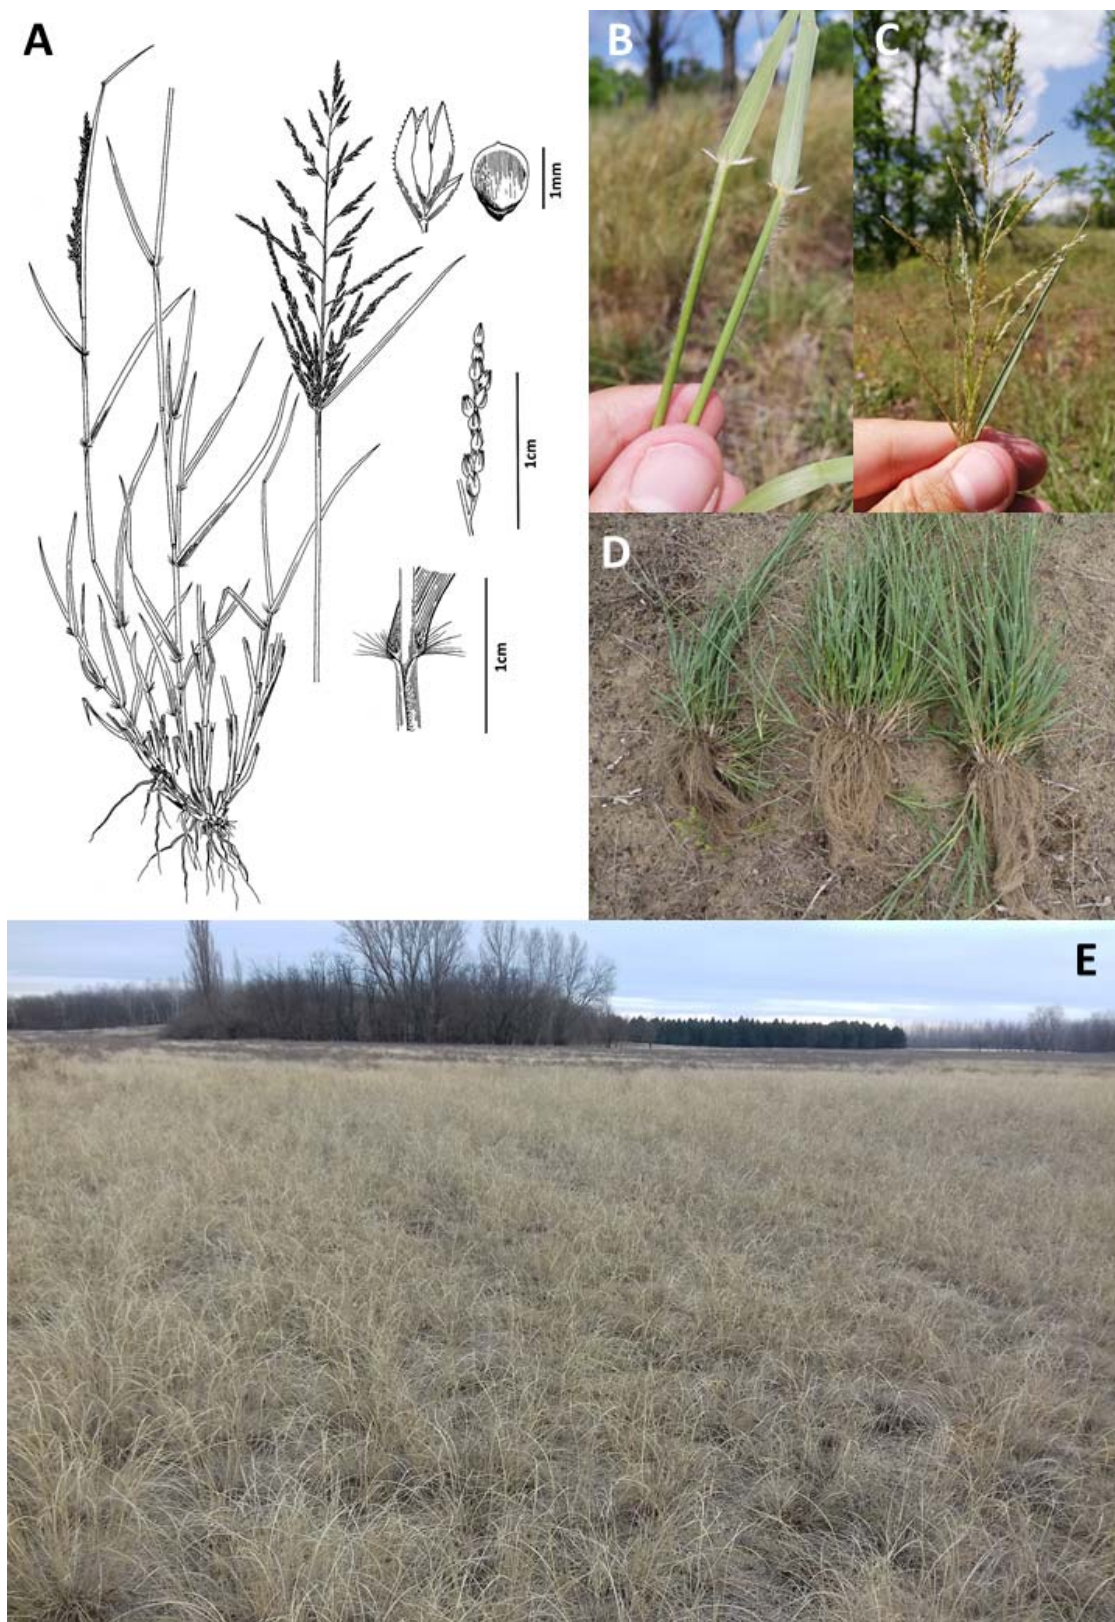

661  
662  
663  
664  
665  
666  
667  
668

**Figure 1.** The habitus and morphological characteristics of *Sporobolus cryptandrus*. Notations: A) habitus and morphological characteristics of the species (drawings by J. Táborská), B) Nodes with leaves and C) inflorescences (photos by Z. Bátori); D) root system of the species (photo by E. Aradi); and E) a site in the Kiskunság region with a mass invasion by *S. cryptandrus* (photo by C. Tölgyesi).



## Sand dropseed - a new pest in Eurasia

669

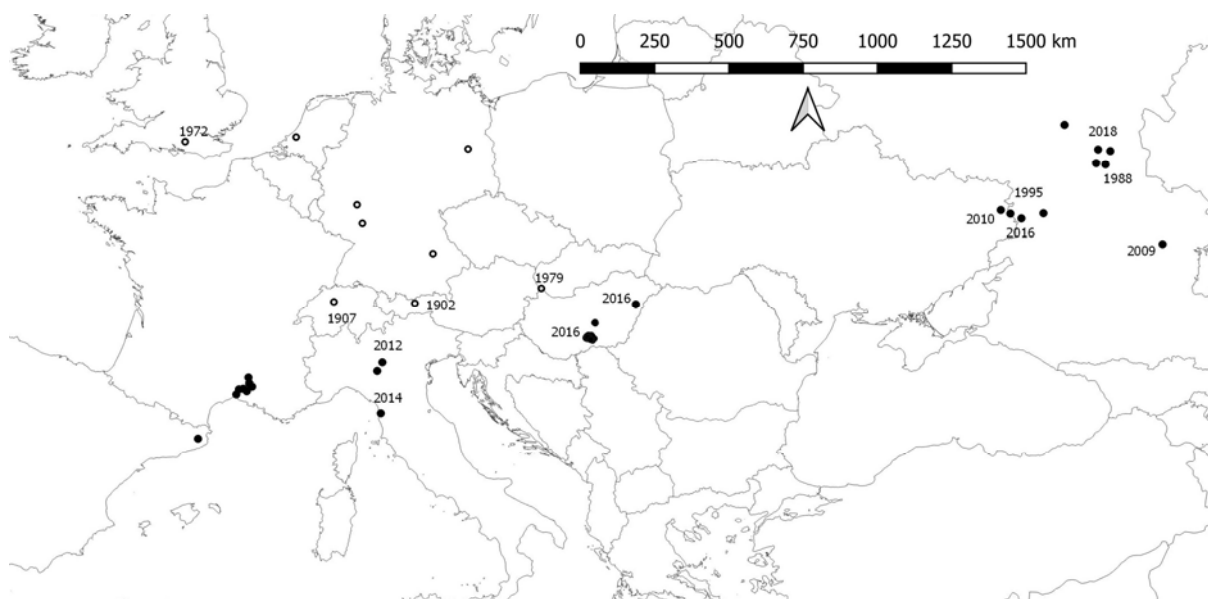

670

671

672 **Figure 2.** The distribution of *Sporobolus cryptandrus* in Eurasia. The full symbols show naturalised  
673 populations, while the empty ones denote casual establishment. See more details on locations in  
674 Electronic Appendix 1.

675

## Sand dropseed - a new pest in Eurasia

676

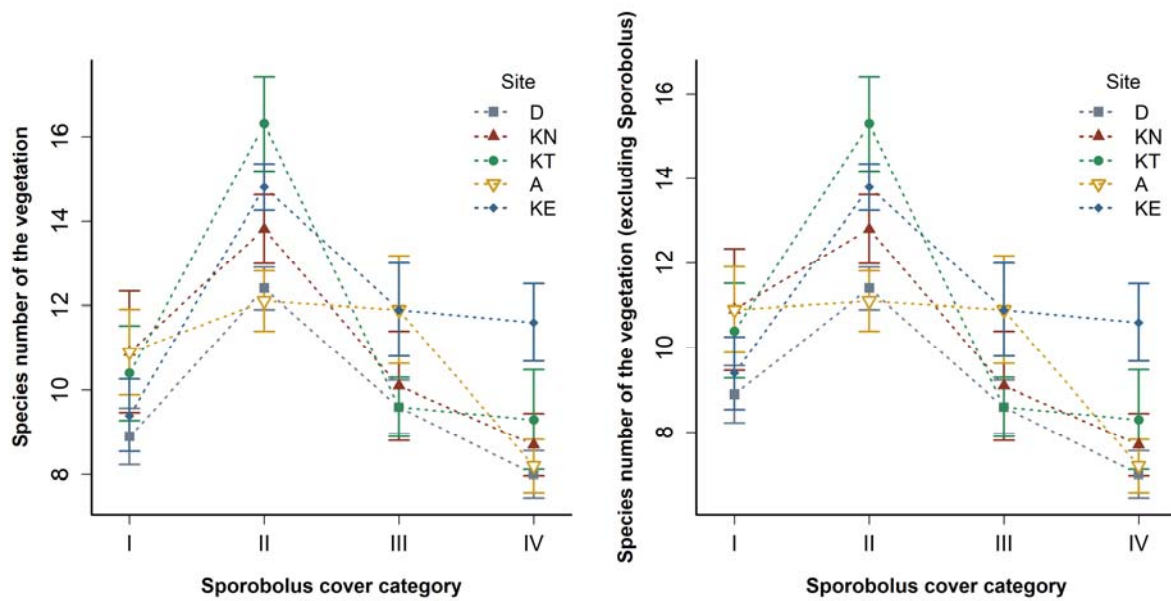

677

678

679

680

681

**Figure 3.** The relationship between *Sporobolus* cover categories and the species richness of the vegetation in the study sites.

## Sand dropseed - a new pest in Eurasia

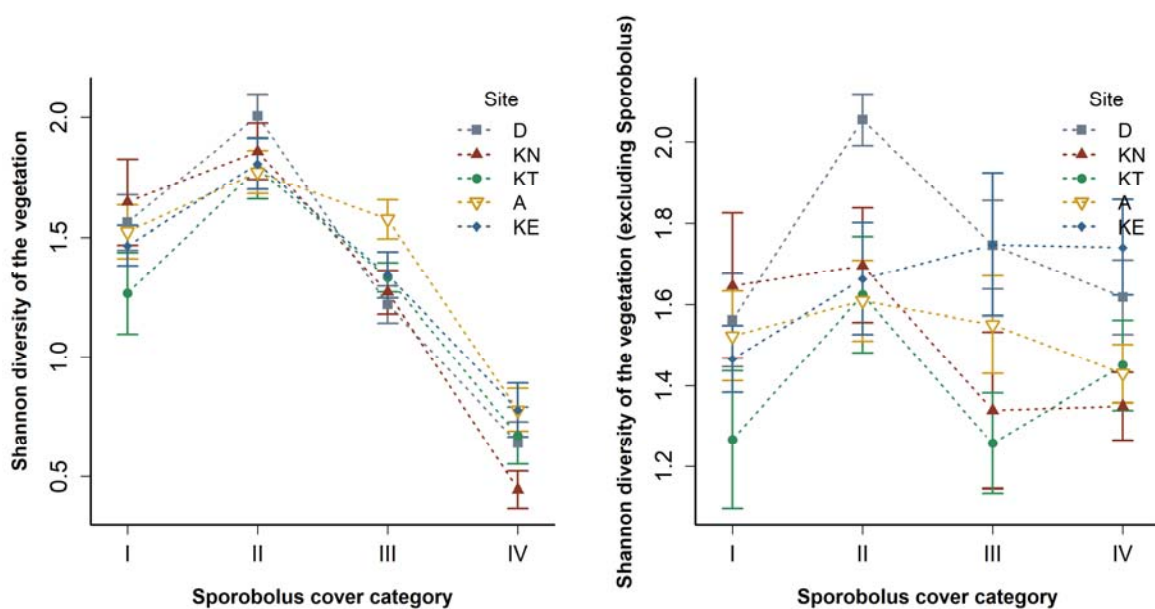

682  
683  
684  
685  
686  
687

**Figure 4.** The relationship between *Sporobolus* cover categories and the Shannon diversity of the vegetation in the study sites.

## Sand dropseed - a new pest in Eurasia

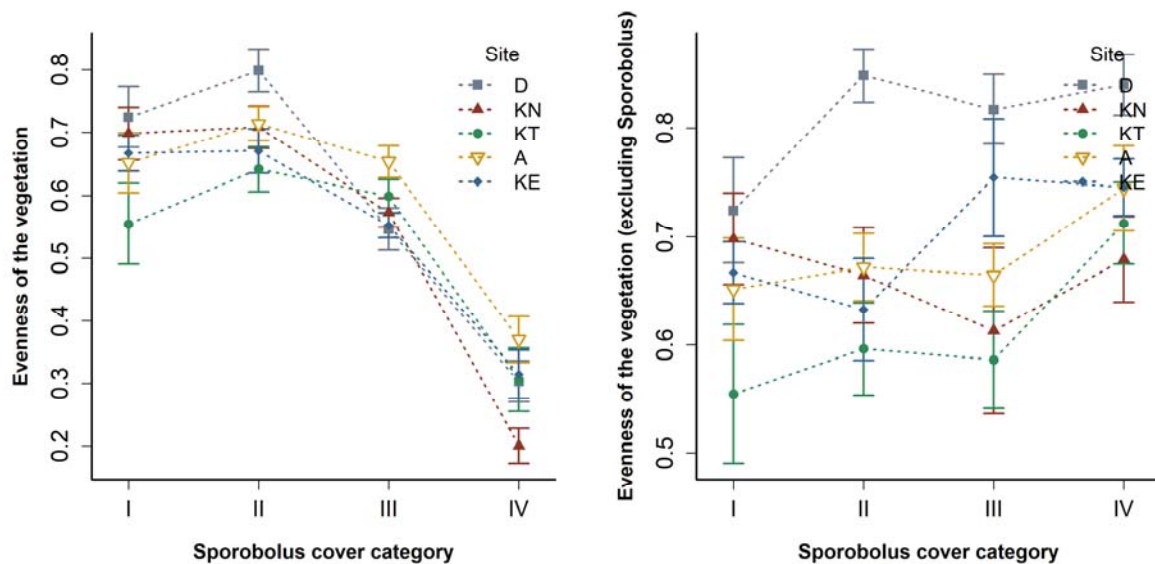

688  
689  
690  
691  
692

**Figure 5.** The relationship between *Sporobolus* cover categories and the evenness of the vegetation in the study sites.

Sand dropseed - a new pest in Eurasia

693

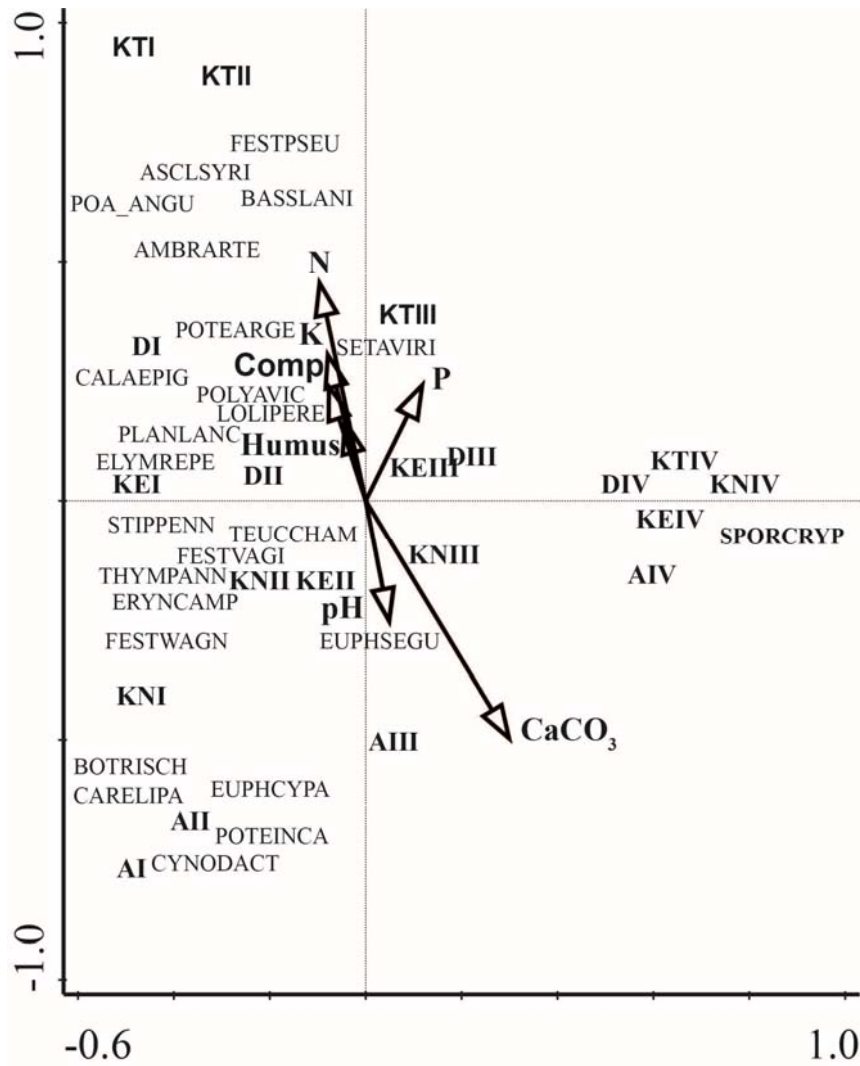

694

695

696

697

698

699

700

701

702

703

704

705

706

707

708

709

710

711

712

713

**Figure 6.** PCA triplot with the 25 most abundant species (Eigenvalues are 0.772 and 0.070 for the first and second axis, respectively). Vegetation composition of the mass locality sites with different cover of *Sporobolus*. Main matrix is the species abundances (10 plots per site and *Sporobolus* cover categories are pooled, four pooled plots per site are included (I-IV)). Sites: D = Debrecen site, KN = Kiskunhalas North, KT = Katonatelep, A = Airport, KE = Kiskunhalas East. Species are abbreviated using the first four letters of the genus names and four letters of the species names. Species are the following: SPORCRYPT = *Sporobolus cryptandrus*, CYNODACT = *Cynodon dactylon*, BOTRISCH = *Bothriochloa ischaemum*, CARELIPA = *Carex liparocarpos*, FESTPSEU = *Festuca pseudovina*, POA\_ANGU = *Poa angustifolia*, POTEINCA = *Potentilla incana*, FESTWAGN = *Festuca wagneri*, BASSLANI = *Bassia laniflora*, EUPHCYPA = *Euphorbia cyparissias*, FESTVAGI = *Festuca vaginata*, EUPHSEGU = *Euphorbia seguieriana*, STIPPENN = *Stipa pennata*, POLYAVIC = *Polygonum aviculare*, PLANLANC = *Plantago lanceolata*, ASCLSYRI = *Asclepias syriaca*, ERYNCAMP = *Eryngium campestre*, LOLIPERE = *Lolium perenne*, POTEARGE = *Potentilla argentea*, ELYMREPE = *Elymus repens*, THYMPANN = *Thymus pannonicus*, TEUCCHAM = *Teucrium chamaedrys*, AMBRARTE = *Ambrosia artemisiifolia*, CALAEPIG = *Calamagrostis epigeios*, SETAVIRI = *Setaria viridis*.

## Sand dropseed - a new pest in Eurasia

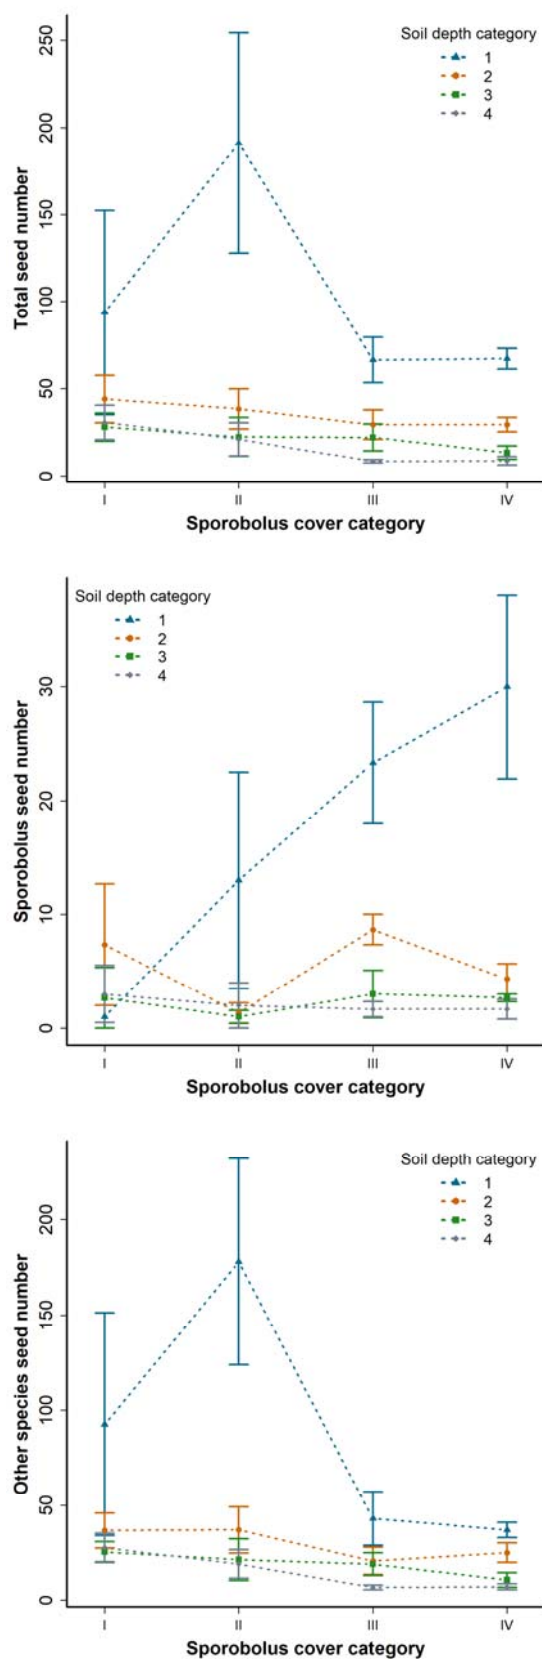

714  
715  
716  
717  
718

**Figure 7.** The relationship between *Sporobolus* cover categories and total seed bank density, density of the seed bank of *Sporobolus* and other species.

## Sand dropseed - a new pest in Eurasia

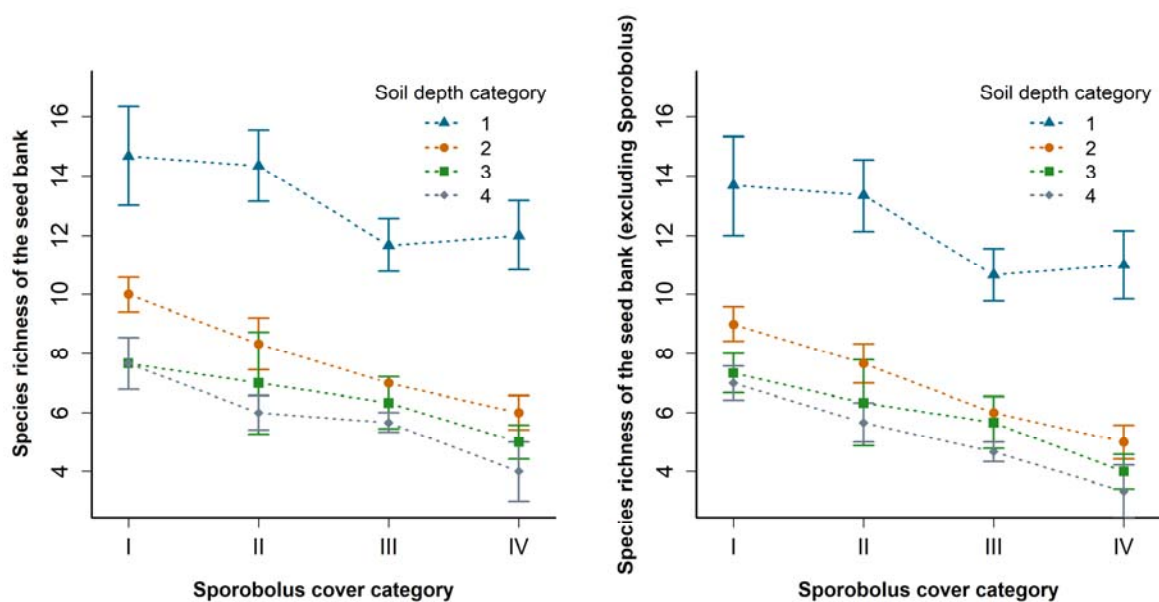

719  
720  
721  
722  
723

**Figure 8.** The relationship between *Sporobolus* cover categories and species richness in the seed banks.

## Sand dropseed - a new pest in Eurasia

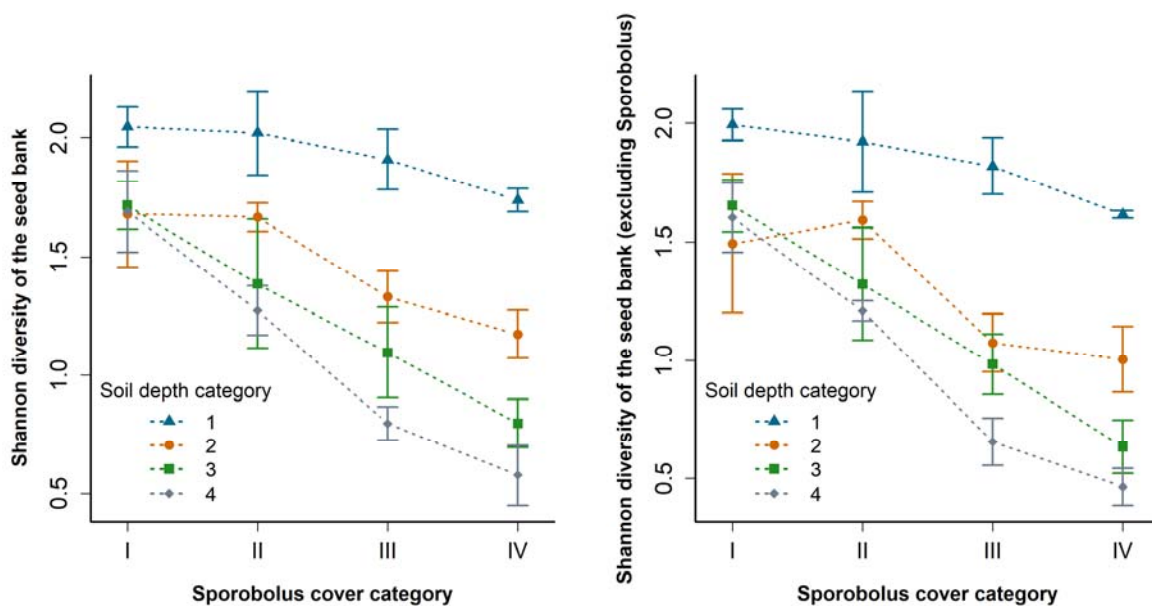

724  
725  
726  
727

**Figure 9.** The relationship between *Sporobolus* cover categories and the Shannon diversity of the seed banks.



## Sand dropseed - a new pest in Eurasia

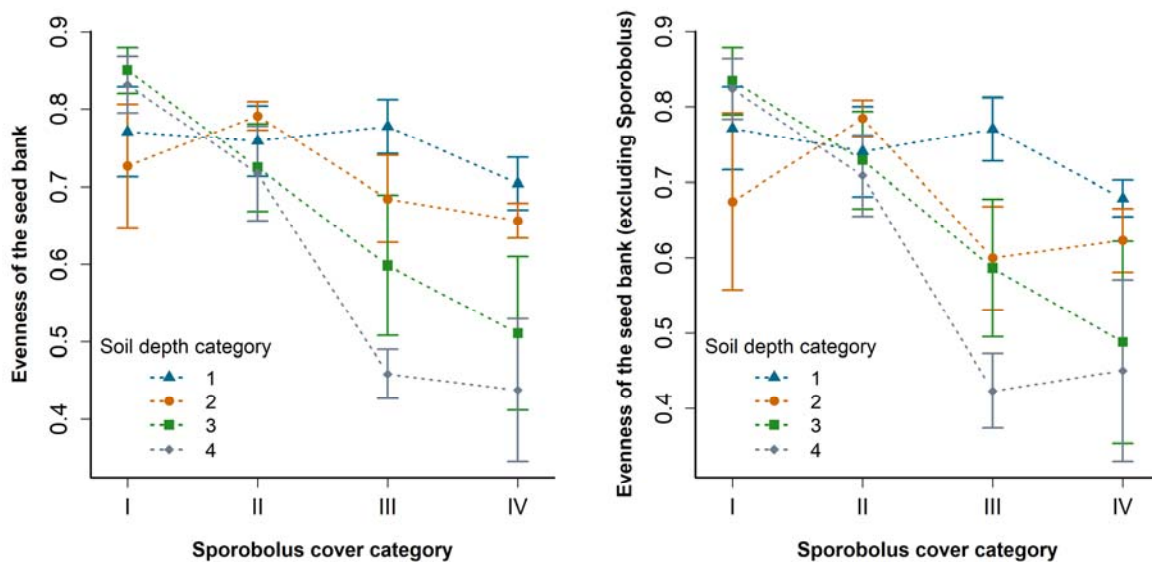

728

729

730

731

732

**Figure 10.** The relationship between *Sporobolus* cover categories and the evenness of the seed bank.

## Sand dropseed - a new pest in Eurasia

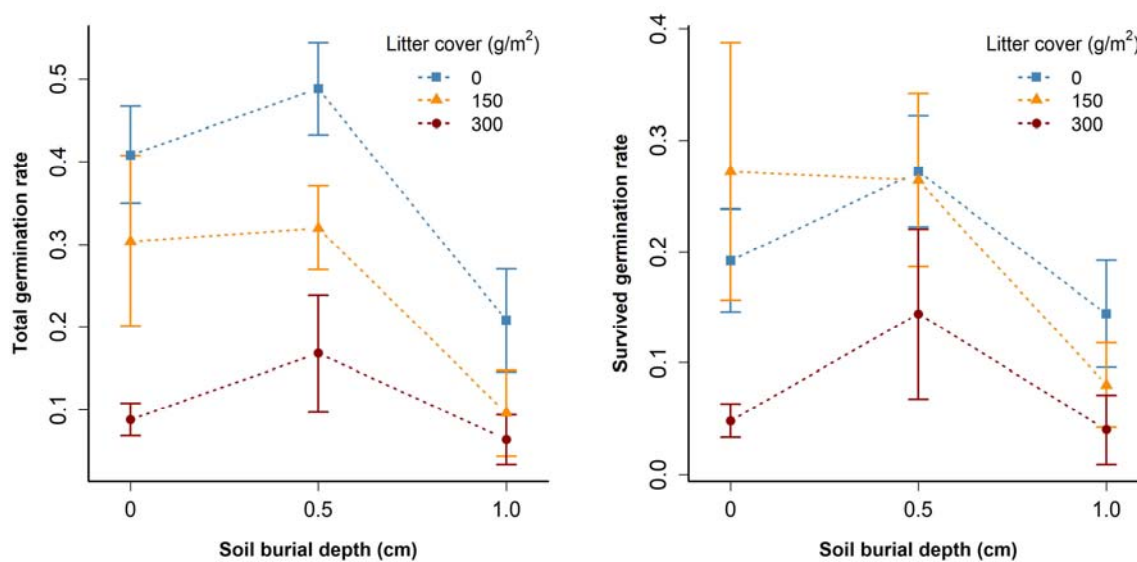

733  
734  
735  
736  
737

**Figure 11.** Effect of litter and soil covering on the total number of germinated seedlings (left) and seedling survival (right) of *Sporobolus cryptandrus*.

738

739 **Table 1.** Sample sites in Central and East Hungary.

740

| Sample sites      | Sample code | Nearest town | GPS coordinates       | Habitat type                                       | Population size of <i>Sporobolus</i> |
|-------------------|-------------|--------------|-----------------------|----------------------------------------------------|--------------------------------------|
| Debrecen          | D           | Debrecen     | 47.55422 N 21.61537 E | Degraded sand grassland in urban area              | 4,000-6,000                          |
| Kiskunhalas North | KN          | Kiskunhalas  | 46.48243 N 19.47987 E | Mosaic of natural sand steppe and pine plantations | 5,000-7,000                          |
| Katonatelep       | KT          | Kecskemét    | 46.95044 N 19.76217 E | Grazed meadow-steppe                               | 200,000-300,000                      |
| Airport           | A           | Kecskemét    | 46.92774 N 19.72590 E | Sandy old-field (30+-year-old)                     | 75,000-100,000                       |
| Kiskunhalas East  | KE          | Kiskunhalas  | 46.40935 N 19.56305 E | Disturbed sandy forest-steppe                      | 1,500-2,000                          |

741

742 **Table 2.** Soil characteristics of the study sites (mean±SE). Measured units: pH (KCl), calcium – CaCO<sub>3</sub> (m/m%), humus (m/m %), nitrogen –  
 743 NO<sub>2</sub> + NO<sub>3</sub> content (mg/kg), phosphorous – P<sub>2</sub>O<sub>5</sub> (mg/kg), potassium – K<sub>2</sub>O (mg/kg). Soil compactness is strongly related to the physical texture  
 744 of the soil; higher scores refer for higher proportion loam-clay fine soil components (e.g., some physical soil texture types are the following: sand  
 745 = 25-30, sandy loam = 31-37, loam = 38-42, clay-loam = 43-50).

746

| Site              | Sample code | pH (KCl)  | Soil compactness | CaCO <sub>3</sub> | Humus     | Nitrogen  | Phosphorous  | Potassium    |
|-------------------|-------------|-----------|------------------|-------------------|-----------|-----------|--------------|--------------|
| Debrecen          | D           | 6.16±0.07 | 43.40±2.29       | 0.13±0.02         | 3.18±0.36 | 2.81±0.99 | 385.80±53.69 | 340.60±33.24 |
| Kiskunhalas North | KN          | 7.02±0.10 | 30.40±0.68       | 1.85±0.22         | 1.20±0.20 | 2.68±0.20 | 38.68±5.50   | 55.28±9.13   |
| Katonatelep       | KT          | 7.15±0.06 | 43.00±1.34       | 1.08±0.43         | 2.30±0.22 | 3.68±0.69 | 112.20±19.68 | 171.80±11.16 |
| Airport           | A           | 7.47±0.01 | 41.80±1.11       | 2.53±0.44         | 2.11±0.13 | 1.89±0.19 | 58.24±11.66  | 120.40±1.78  |
| Kiskunhalas East  | KE          | 7.41±0.04 | 34.00±1.41       | 2.68±0.26         | 0.94±0.25 | 2.35±0.42 | 37.70±5.63   | 53.24±4.59   |

747

Sand dropseed - a new pest in Eurasia

748 **Table 3.** Effect of increasing cover of *Sporobolus cryptandrus* on vegetation characteristics of  
 749 the subjected plots (two-way ANOVA, significant values are indicated with boldface,  
 750  $p < 0.05$ ).  
 751

| Vegetation                         | <i>Sporobolus</i> cover   |                  | Sampling site             |                  | <i>Sporobolus</i> cover ×<br>Sampling site |              |
|------------------------------------|---------------------------|------------------|---------------------------|------------------|--------------------------------------------|--------------|
|                                    | <i>F</i> <sub>3,199</sub> | <i>p</i>         | <i>F</i> <sub>4,199</sub> | <i>p</i>         | <i>F</i> <sub>12,199</sub>                 | <i>p</i>     |
| <b>including <i>Sporobolus</i></b> |                           |                  |                           |                  |                                            |              |
| Species richness                   | <b>24.241</b>             | <b>&lt;0.001</b> | <b>3.100</b>              | <b>0.017</b>     | 1.795                                      | 0.052        |
| Shannon diversity                  | <b>105.361</b>            | <b>&lt;0.001</b> | 1.068                     | 0.374            | 1.547                                      | 0.111        |
| Evenness                           | <b>121.418</b>            | <b>&lt;0.001</b> | <b>2.898</b>              | <b>0.023</b>     | <b>2.280</b>                               | <b>0.010</b> |
| <b>excluding <i>Sporobolus</i></b> |                           |                  |                           |                  |                                            |              |
| Species richness                   | <b>22.455</b>             | <b>&lt;0.001</b> | <b>3.100</b>              | <b>0.017</b>     | 1.795                                      | 0.052        |
| Shannon diversity                  | <b>3.711</b>              | <b>0.013</b>     | <b>4.492</b>              | <b>0.002</b>     | 1.209                                      | 0.280        |
| Evenness                           | <b>3.480</b>              | <b>0.017</b>     | <b>10.972</b>             | <b>&lt;0.001</b> | 1.079                                      | 0.380        |

752  
 753

Sand dropseed - a new pest in Eurasia

754  
755  
756  
757

**Table 4.** Effect of *Sporobolus cryptandrus* cover on seed bank composition of the subjected plots. Significant effects were denoted with boldface (two-way ANOVA).

| Characteristic                     | <i>Sporobolus</i> cover  |                  | Soil layer               |                  | <i>Sporobolus</i> cover<br>× Soil layer |              |
|------------------------------------|--------------------------|------------------|--------------------------|------------------|-----------------------------------------|--------------|
|                                    | <i>F</i> <sub>3,47</sub> | <i>p</i>         | <i>F</i> <sub>3,47</sub> | <i>p</i>         | <i>F</i> <sub>9,47</sub>                | <i>p</i>     |
| <b>Seedling number</b>             |                          |                  |                          |                  |                                         |              |
| Total                              | 2.442                    | 0.082            | <b>12.465</b>            | <b>&lt;0.001</b> | 1.503                                   | 0.189        |
| <i>Sporobolus</i>                  | 2.727                    | 0.060            | <b>12.845</b>            | <b>&lt;0.001</b> | <b>2.913</b>                            | <b>0.012</b> |
| Other species                      | <b>3.848</b>             | <b>0.019</b>     | <b>10.133</b>            | <b>&lt;0.001</b> | 2.024                                   | 0.069        |
| <b>including <i>Sporobolus</i></b> |                          |                  |                          |                  |                                         |              |
| Species richness                   | <b>8.697</b>             | <b>&lt;0.001</b> | <b>47.602</b>            | <b>&lt;0.001</b> | 0.312                                   | 0.965        |
| Shannon diversity                  | <b>19.698</b>            | <b>&lt;0.001</b> | <b>26.435</b>            | <b>&lt;0.001</b> | 1.419                                   | 0.222        |
| Evenness                           | <b>11.914</b>            | <b>&lt;0.001</b> | <b>4.320</b>             | <b>0.011</b>     | <b>2.277</b>                            | <b>0.042</b> |
| <b>excluding <i>Sporobolus</i></b> |                          |                  |                          |                  |                                         |              |
| Species richness                   | <b>11.626</b>            | <b>&lt;0.001</b> | <b>50.652</b>            | <b>&lt;0.001</b> | 0.264                                   | 0.980        |
| Shannon diversity                  | <b>23.346</b>            | <b>&lt;0.001</b> | <b>26.845</b>            | <b>&lt;0.001</b> | 1.622                                   | 0.151        |
| Evenness                           | <b>8.659</b>             | <b>&lt;0.001</b> | 2.482                    | 0.079            | 1.612                                   | 0.154        |

758

## Sand dropseed - a new pest in Eurasia

759 **Table 5.** Effect of litter and soil cover on total germination rate and seedling survival of  
760 *Sporobolus cryptandrus* (two-way ANOVA, significant values are indicated with boldface,  
761  $p < 0.05$ ).  
762

| <b>Germination</b>     | <b>Litter cover</b>      |                  | <b>Soil cover</b>        |              | <b>Litter cover ×<br/>Soil cover</b> |          |
|------------------------|--------------------------|------------------|--------------------------|--------------|--------------------------------------|----------|
|                        | <i>F</i> <sub>2,45</sub> | <i>p</i>         | <i>F</i> <sub>2,45</sub> | <i>p</i>     | <i>F</i> <sub>4,45</sub>             | <i>p</i> |
| Total germination rate | <b>14.139</b>            | <b>&lt;0.001</b> | <b>9.005</b>             | <b>0.001</b> | 0.932                                | 0.456    |
| Seedling survival      | <b>4.153</b>             | <b>0.024</b>     | <b>3.777</b>             | <b>0.032</b> | 0.612                                | 0.657    |

763

1 **Electronic Appendix 1.** The distribution of *Sporobolus cryptandrus* in Eurasia based on published literature data. For the locations visualised on  
 2 a map please see also Figure 2.  
 3

| Country or area | Exact location                                      | Population status | Year of observation | Basis of record | Reference                  |
|-----------------|-----------------------------------------------------|-------------------|---------------------|-----------------|----------------------------|
| Austria         | Mühlau bei Innsbruck                                | casual            | 1902                | publication     | Murr (1902)                |
| France          | Gard: Collias, Montfrin and Sainte-Anastasie        | naturalized       | Not reported        | atlas           | NMBC (2021)                |
| France          | Hérault: Baillargues                                | naturalized       | Not reported        | atlas           | NMBC (2021)                |
| France          | Vaucluse: Caderousse, Lamotte-du-Rhône and Sorgues  | naturalized       | Not reported        | atlas           | NMBC (2021)                |
| France          | Sorgues on the island of Oiselet (South of Perrine) | naturalized       | 2020                | atlas           | NMBC (2021)                |
| Germany         | Berlin                                              | casual            | Not reported        | atlas           | Dflor (2021)               |
| Germany         | Regensburg                                          | casual            | Not reported        | atlas           | Dflor (2021)               |
| Germany         | Ingelheim am Rhein                                  | casual            | Not reported        | atlas           | Dflor (2021)               |
| Germany         | Nahe/Saar                                           | casual            | Not reported        | atlas           | Dflor (2021)               |
| Great Britain   | Blackmoor                                           | casual            | 1972-1975           | publication     | Ryves (1988)               |
| Hungary         | Győr                                                | casual            | 1927                | publication     | Polgár (1933)              |
| Hungary         | Debrecen (Nyírség region)                           | naturalized       | 2016                | publication     | Török & Aradi (2016)       |
| Hungary         | Kiskunhalas (Kiskunság region)                      | naturalized       | 2016                | publication     | Török & Aradi (2016)       |
| Italy           | Monticelli d'Ongina (Isola Serafini)                | naturalized       | 2012                | publication     | Nobis et al. (2015)        |
| Italy           | Tenuta di San Rossore (Pisa)                        | naturalized       | 2014                | publication     | Sani et al. (2015)         |
| Italy           | Monticelli d'Ongina, Piacenza                       | naturalized       | 2013                | publication     | Romani et al. (2015)       |
| The Netherlands | Rotterdam                                           | casual            | Not reported        | atlas           | Sparrius et al. (2019)     |
| Russia          | Volzhsky, Volgograd Oblast                          | naturalized       | 2018                | publication     | Maltsev & Sagalaev (2018)  |
| Russia          | Derkul, Rostov Oblast                               | naturalized       | 2016                | publication     | Demina et al. (2016)       |
| Russia          | Kalitva, Rostov Oblast                              | naturalized       | 2016                | publication     | Demina et al. (2016)       |
| Russia          | Seversky Donets                                     | naturalized       | 2016                | publication     | Demina et al. (2016)       |
| Russia          | Bykovsky District                                   | naturalized       | 1988                | publication     | Maltsev & Sagalaev (2018)  |
| Russia          | Kamensk Shakhtinsky, Seversky Donets                | naturalized       | 1995                | publication     | Alekseev et al. (1996)     |
| Russia          | Kalmyk Republic                                     | naturalized       | 2009                | publication     | Kuvaev & Stepanova (2014)  |
| Switzerland     | Derendingen bei Solothurn                           | casual            | 1907                | publication     | Thellung (1919)            |
| Slovakia        | Bratislava                                          | casual            | 1979                | publication     | Holub & Jehlík (1987)      |
| Ukraine         | Triokhizbensky Steppe                               | naturalized       | 2010                | publication     | Gouz & Timoshenkova (2017) |

4  
5

6 **References**

- 7
- 8 Alekseev Y. E., Pavlov V. N. & Sagalaev V. A. (1996) *Sporobolus cryptandrus* (Torr.) Gray (Gramineae): new adventitious species in the flora  
9 of Russia and former USSR. [новый адвентивный вид во флоре России и бывшего СССР] – *Byulleten' Moskovskogo Obshchestva*  
10 *Ispytatelei Prirody Otdel Biologicheskii* 101: 98–102.
- 11
- 12 Demina O. N., Rogal' L. L. & Mayorov S. R. (2016) *Sporobolus cryptandrus* (Torr.) A. Gray (Gramineae) – an invasive species of flora in the  
13 Rostov region [In Russian, Демина О.Н.,Рогаль Л.Л.,Майоров С.Р., *Sporobolus cryptandrus*(Torr.) A. Gray (Gramineae) –инвазионный  
14 вид флоры на территории Ростовской области] – “*Living and Bioinert Systems*” 15: article 7.
- 15
- 16 Dflor (2021): <https://deutschlandflora.de/dflor/de/support/haeufig-gestellte-fragen>; Accessed: Accessed: 31.03.2021
- 17
- 18 Gouz G. V. & Timoshenkova V. V. (2017) The first record of *Sporobolus cryptandrus* (Poaceae) for Ukraine and new records for southeastern  
19 Ukraine from Triokhizbensky Steppe. [in Ukrainian: Гузь, Г. В. & Тимошенкова, В. В. 2017: Первая в Украине находка *Sporobolus*  
20 *cryptandrus* (Poaceae) и новые для флоры юговостока Украины виды с территории „Трехизбенской степи”] – *Ukrainian Botanical*  
21 *Journal* 74: 64–70.
- 22
- 23 Holub J. & Jehlík V. (1987) *Sporobolus cryptandrus* v Československu. [*Sporobolus cryptandrus* in Czechoslovakia]. – *Preslia* 59: 117–134.
- 24
- 25 Kuvaev A. V. & Stepanova N. Yu. (2014) Floristic records from Kalmyk republic. part 4. –*Byull. MOIP. Otd. biol.* 119: 71–72.
- 26
- 27 Maltsev M. V. & Sagalaev V. A. (2018) Community *Sporobolus cryptandrus* (Torr.) A. Gray in the Northern Part of Volga-Akhtuba Floodplain.  
28 [In Russian, Сообщества *Sporobolus cryptandrus* (Torr.) A. Gray на территории северной части Волго-Ахтубинской поймы] – *Natural*  
29 *Systems and Resources* 8: 5–14.
- 30
- 31 Murr J. (1902) Beiträge zur Flora von Tirol und Vorarlberg. XIV – *Deutsche Bot. Monatsschr.* 20: 117–123.
- 32
- 33 NMBC (2021): National Mediterranean Botanical Conservatory (Cyril Cottaz), Accessed: Accessed: 31.03.2021
- 34
- 35 Nobis M., Ebel A. L., Nowak A., Paszko B., Bobrov A. A., Kotukhov Y. A., Kupriyanov A. N., Nobis A., Zalewska-Gałosz J., Olonova M. V.,  
36 Verloove F., Chen W., Kushunina M., Kwolek D., Lashchinskiy N. N., Piwowarczyk R., Sukhorukov A. P., Nowak S., Plášek V. & Pliszko  
37 A. (2015). Contribution to the flora of Asian and European countries: new national and regional vascular plant records, 4. – *Acta Botanica*  
38 *Gallica*, 162: 301–316.
- 39
- 40 Polgár S. (1933) Neue Beiträge zur Adventivflora von Győr (Westungarn) IV. – *Magyar Botanikai Lapok* 32: 71–77.



- 41  
42 Romani E., Banfi E. & Galasso G. (2015) *Informatore Botanico Italiano* 47(1): 77–90.  
43
- 44 Ryves T. B. (1988) Supplementary list of wool-alien grasses recorded from Blackmoor, North Hants., 1959–1976 – *Watsonia*. 17: 76–79.  
45
- 46 Sani A., D’Antraccoli M. & Peruzzi L. (2015) *Sporobolus cryptandrus* (Torr.) A. Gray (Poaceae) in Raab-Straube E., Raus T. *Euro+Med-*  
47 *Checklist Notulae*, 4 – *Willdenowia* 45: pp. 125.  
48
- 49 Sparrius, L., van Heeswijk J., Dirkse G. M. & Verhofstad M. J. J. M. (2019) FLORIVON v11.6. FLORON Plant Conservation Nederland.  
50 Dataset/Occurrence. <http://www.verspreidingsatlas.nl:8085/ipt/resource?r=florivon&v=11.6>; Accessed: 31.03.2021  
51
- 52 Thellung A. (1919) Beiträge zur Adventivflora der Schweiz (III). – *Vierteljahresschr. Naturforsch. Ges. Zürich*. 64: 684–815.  
53
- 54 Török P. & Aradi E. (2017) A new potentially invasive grass, sand dropseed (*Sporobolus cryptandrus*) discovered in sandy areas of Hungary – A  
55 call for information on new localities. – *Bulletin of the Eurasian Dry Grassland Group* 35: 24–25.

1 **Electronic Appendix 2A.** Species composition of the vegetation at the Debrecen study site.  
 2 Cover categories: I: nearby reference sites where *Sporobolus* is missing, II: 1-25% of  
 3 *Sporobolus* cover, III: 26-50% of *Sporobolus* cover, IV >50% of *Sporobolus* cover. In each  
 4 cover category the cover scores of species in 10, 1-m<sup>2</sup>-sized plots were averaged (mean±SE).

5

| Species                                    | I          | II                | III               | IV                |
|--------------------------------------------|------------|-------------------|-------------------|-------------------|
| <i>Sporobolus cryptandrus</i>              |            | <b>13.20±1.96</b> | <b>38.40±2.35</b> | <b>62.10±1.39</b> |
| <i>Achillea collina</i>                    | 0.80±0.42  |                   |                   | 0.05±0.05         |
| <i>Ambrosia artemisiifolia</i>             | 0.10±0.10  |                   | 0.07±0.07         |                   |
| <i>Arenaria leptoclados</i>                | 0.71±0.24  | 0.95±0.40         | 0.20±0.11         | 0.05±0.05         |
| <i>Bellis perennis</i>                     | 0.10±0.10  |                   |                   |                   |
| <i>Bromus arvensis</i>                     |            | 0.10±0.10         |                   |                   |
| <i>Bromus hordeaceus</i>                   | 0.80±0.35  | 0.01±0.01         |                   | 0.05±0.05         |
| <i>Cerastium semidecandrum</i>             | 0.01±0.01  | 0.01±0.01         |                   |                   |
| <i>Chenopodium album</i>                   |            | 0.20±0.20         | 0.26±0.20         | 0.01±0.01         |
| <i>Convolvulus arvensis</i>                | 1.87±1.49  | 0.61±0.34         | 0.25±0.20         | 0.20±0.20         |
| <i>Conyza canadensis</i>                   | 0.01±0.01  | 0.13±0.10         |                   |                   |
| <i>Cynodon dactylon</i>                    | 0.55±0.50  | 4.10±2.47         | 1.90±0.75         | 0.70±0.33         |
| <i>Digitaria sanguinalis</i>               | 0.05±0.05  | 1.80±0.90         | 0.45±0.29         | 0.08±0.06         |
| <i>Echinochloa crus-galli</i>              | 0.20±0.20  |                   |                   |                   |
| <i>Eragrostis minor</i>                    |            | 2.30±0.56         | 1.63±0.66         | 0.65±0.39         |
| <i>Erodium cicutarium</i>                  | 1.39±0.78  | 1.63±0.66         | 1.20±0.51         | 1.05±0.27         |
| <i>Lolium perenne</i>                      | 12.80±4.27 | 0.20±0.20         |                   |                   |
| <i>Malva neglecta</i>                      |            | 0.20±0.20         |                   |                   |
| <i>Medicago lupulina</i>                   |            | 0.05±0.05         | 0.10±0.10         |                   |
| <i>Medicago minima</i>                     | 0.40±0.31  | 3.06±0.62         | 1.60±0.43         | 1.41±0.39         |
| <i>Medicago monspeliaca</i>                |            |                   |                   | 0.05±0.05         |
| <i>Oxalis stricta</i>                      | 0.01±0.01  | 0.01±0.01         |                   |                   |
| <i>Plantago lanceolata</i>                 | 9.10±2.30  | 2.80±0.92         | 2.50±0.74         | 1.15±0.47         |
| <i>Plantago major</i>                      | 0.05±0.05  |                   |                   |                   |
| <i>Poa angustifolia</i>                    | 0.61±0.50  |                   |                   |                   |
| <i>Polygonum aviculare</i>                 | 6.20±2.20  | 7.30±1.71         | 4.30±1.40         | 2.95±0.60         |
| <i>Portulaca oleracea</i>                  |            | 2.00±0.63         | 0.90±0.20         | 0.68±0.24         |
| <i>Potentilla argentea</i>                 | 2.75±0.74  | 3.10±0.71         | 3.40±1.03         | 1.20±0.47         |
| <i>Scleranthus annuus</i>                  | 0.30±0.21  |                   | 0.13±0.10         | 0.13±0.07         |
| <i>Setaria viridis</i>                     |            | 2.95±0.45         | 1.09±0.58         | 0.30±0.30         |
| <i>Silene latifolia</i> subsp. <i>alba</i> |            | 0.85±0.33         | 0.15±0.11         |                   |
| <i>Taraxacum campylodes</i>                | 0.10±0.07  |                   |                   |                   |
| <i>Trifolium campestre</i>                 |            |                   |                   | 0.05±0.05         |
| <i>Trifolium repens</i>                    | 1.28±0.45  | 0.80±0.42         |                   |                   |
| <i>Veronica verna</i>                      | 0.01±0.01  | 0.63±0.20         | 0.07±0.05         | 0.01±0.01         |
| <i>Viola hirta</i>                         | 0.05±0.05  |                   |                   |                   |

6

7

8 **Electronic Appendix 2B.** Species composition of vegetation at the Kiskunhalas North (KN)  
 9 study site. Cover categories: I: nearby reference sites where *Sporobolus* is missing, II: 1-25%  
 10 of *Sporobolus* cover, III: 26-50% of *Sporobolus* cover, IV >50% of *Sporobolus* cover. In each  
 11 cover category the cover scores of species in 10, 1-m<sup>2</sup>-sized plots were averaged (mean±SE).  
 12

| Species                                         | I          | II                | III               | IV                |
|-------------------------------------------------|------------|-------------------|-------------------|-------------------|
| <i>Sporobolus cryptandrus</i>                   |            | <b>12.40±1.73</b> | <b>30.30±1.56</b> | <b>72.00±2.89</b> |
| <i>Achillea collina</i>                         | 0.50±0.50  |                   |                   |                   |
| <i>Allium vineale</i>                           |            |                   |                   | 0.01±0.01         |
| <i>Alyssum alyssoides</i>                       | 0.50±0.50  | 0.02±0.01         |                   |                   |
| <i>Ambrosia artemisiifolia</i>                  | 0.15±0.15  | 0.42±0.30         | 0.05±0.05         | 0.11±0.10         |
| <i>Anthemis ruthenica</i>                       |            |                   | 0.60±0.31         |                   |
| <i>Apera spica-venti</i>                        |            | 0.70±0.52         | 0.40±0.31         | 0.36±0.30         |
| <i>Arenaria serpyllifolia</i>                   | 0.50±0.31  | 0.05±0.02         | 0.08±0.05         | 0.02±0.01         |
| <i>Asclepias syriaca</i>                        | 1.18±0.81  |                   |                   |                   |
| <i>Bassia laniflora</i>                         | 0.98±0.79  | 3.18±1.97         | 0.47±0.40         | 0.06±0.05         |
| <i>Bothriochloa ischaemum</i>                   | 1.90±1.08  | 1.50±1.50         |                   |                   |
| <i>Bromus squarrosus</i>                        | 3.55±1.76  | 0.09±0.05         | 0.13±0.10         | 0.76±0.32         |
| <i>Bromus tectorum</i>                          |            | 0.02±0.01         | 0.20±0.13         | 0.02±0.01         |
| <i>Calamagrostis epigejos</i>                   |            | 0.20±0.20         |                   |                   |
| <i>Carex liparicarpos</i>                       | 5.95±3.68  |                   |                   |                   |
| <i>Carex stenophylla</i>                        |            | 0.70±0.70         |                   |                   |
| <i>Celtis occidentalis</i>                      |            | 0.01±0.01         |                   |                   |
| <i>Centaurea arenaria</i>                       |            |                   |                   | 0.30±0.30         |
| <i>Cerastium semidecandrum</i>                  |            |                   | 0.01±0.01         |                   |
| <i>Chenopodium album</i>                        |            | 0.20±0.20         | 0.32±0.30         |                   |
| <i>Chondrilla juncea</i>                        | 0.05±0.03  | 0.60±0.43         | 0.20±0.13         | 0.30±0.21         |
| <i>Consolida regalis</i>                        | 0.11±0.10  | 0.20±0.20         | 0.01±0.01         |                   |
| <i>Conyza canadensis</i>                        |            | 0.15±0.11         | 0.30±0.15         | 0.16±0.11         |
| <i>Crepis foetida</i> subsp. <i>rheadifolia</i> | 0.13±0.10  | 0.10±0.10         |                   | 0.01±0.01         |
| <i>Cynodon dactylon</i>                         | 15.60±4.18 | 8.55±3.22         | 11.20±3.52        | 0.43±0.20         |
| <i>Cynoglossum officinale</i>                   |            |                   |                   | 0.01±0.01         |
| <i>Dianthus polymorphus</i>                     | 0.03±0.03  |                   |                   |                   |
| <i>Elymus repens</i>                            | 0.03±0.03  |                   |                   |                   |
| <i>Equisteum ramosissimum</i>                   |            | 0.15±0.11         | 0.05±0.05         |                   |
| <i>Eryngium campestre</i>                       | 4.78±2.66  | 0.90±0.41         | 0.30±0.21         | 0.70±0.50         |
| <i>Erysimum diffusum</i>                        | 1.49±0.79  | 0.40±0.27         | 0.52±0.22         | 0.01±0.01         |
| <i>Euphorbia cyparissias</i>                    | 5.20±2.54  | 1.81±0.74         | 0.80±0.55         | 1.20±0.68         |
| <i>Euphorbia seguieriana</i>                    | 0.10±0.10  | 5.41±1.96         | 1.85±1.49         | 0.53±0.30         |
| <i>Falcaria vulgaris</i>                        | 0.03±0.03  |                   |                   |                   |
| <i>Festuca pseudovina</i>                       |            |                   |                   | 0.70±0.70         |
| <i>Festuca rupicola</i>                         | 0.80±0.80  |                   |                   |                   |
| <i>Festuca vaginata</i>                         | 1.00±0.54  |                   | 2.05±2.00         |                   |
| <i>Festuca wagneri</i>                          | 13.50±4.84 | 14.10±4.20        | 1.40±0.64         | 0.60±0.50         |
| <i>Helianthemum ovatum</i>                      |            | 0.20±0.20         |                   |                   |
| <i>Koeleria glauca</i>                          | 0.13±0.10  |                   |                   |                   |
| <i>Koeleria pyramidata</i>                      |            |                   | 0.05±0.05         |                   |

13

14

15 **Electronic Appendix 2B. continued.**

16

| <b>Species</b>               | <b>I</b>  | <b>II</b> | <b>III</b> | <b>IV</b> |
|------------------------------|-----------|-----------|------------|-----------|
| <i>Medicago lupulina</i>     | 0.05±0.05 |           |            | 0.10±0.05 |
| <i>Medicago minima</i>       | 0.01±0.01 | 0.37±0.30 | 0.12±0.06  |           |
| <i>Minuartia glomerata</i>   |           | 0.06±0.05 |            | 0.02±0.01 |
| <i>Plantago indica</i>       |           | 0.10±0.10 |            |           |
| <i>Plantago lanceolata</i>   | 0.50±0.50 |           |            |           |
| <i>Poa angustifolia</i>      | 3.05±1.70 | 0.20±0.20 | 0.10±0.10  |           |
| <i>Poa bulbosa</i>           | 0.15±0.15 | 0.11±0.10 |            | 0.14±0.10 |
| <i>Polygonum arenarium</i>   | 0.11±0.06 | 0.77±0.24 | 1.56±0.46  | 0.11±0.05 |
| <i>Populus alba</i>          | 1.15±0.99 | 0.20±0.15 |            | 0.10±0.10 |
| <i>Potentilla incana</i>     | 1.10±0.99 | 1.00±1.00 |            |           |
| <i>Scabiosa ochroleuca</i>   |           | 1.15±0.69 | 0.05±0.05  | 1.10±1.10 |
| <i>Secale sylvestre</i>      | 0.81±0.80 | 0.61±0.34 | 1.05±0.46  | 0.57±0.26 |
| <i>Setaria pumila</i>        |           |           | 0.80±0.80  |           |
| <i>Setaria viridis</i>       | 0.05±0.05 | 0.26±0.13 | 1.40±1.03  |           |
| <i>Silene conica</i>         | 0.10±0.10 | 0.01±0.01 | 0.01±0.01  |           |
| <i>Silene otites</i>         |           | 0.10±0.10 |            |           |
| <i>Stipa capillata</i>       | 3.80±1.98 |           | 0.30±0.30  |           |
| <i>Stipa pennata</i>         |           | 1.70±0.62 | 0.05±0.05  |           |
| <i>Taraxacum campylodes</i>  | 0.01±0.01 |           |            |           |
| <i>Teucrium chamaedrys</i>   |           | 2.70±2.70 |            |           |
| <i>Thymus pannonicus</i>     |           | 2.10±1.55 |            |           |
| <i>Tragopogon dubius</i>     |           |           | 0.10±0.10  |           |
| <i>Tragopogon orientalis</i> |           | 0.01±0.01 |            |           |
| <i>Tragus racemosus</i>      |           |           | 0.40±0.31  |           |
| <i>Tribulus terrestris</i>   |           |           | 0.01±0.01  |           |
| <i>Trifolium campestre</i>   |           | 0.01±0.01 |            |           |
| <i>Veronica arvensis</i>     |           |           | 0.01±0.01  |           |
| <i>Veronica praecox</i>      |           | 0.01±0.01 | 0.05±0.05  |           |
| <i>Veronica prostrata</i>    |           | 0.10±0.10 |            |           |

17

18 **Electronic Appendix 2C.** Species composition of vegetation at the Katonatelep (KT) study  
 19 site. Cover categories: I: nearby reference sites where *Sporobolus* is missing, II: 1-25% of  
 20 *Sporobolus* cover, III: 26-50% of *Sporobolus* cover, IV >50% of *Sporobolus* cover. In each  
 21 cover category the cover scores of species of 10, 1-m<sup>2</sup>-sized plots were averaged (mean±SE).  
 22

| Species                                         | I         | II                | III               | IV                |
|-------------------------------------------------|-----------|-------------------|-------------------|-------------------|
| <i>Sporobolus cryptandrus</i>                   |           | <b>10.00±1.20</b> | <b>32.40±1.91</b> | <b>65.90±3.33</b> |
| <i>Achillea collina</i>                         |           | 0.60±0.60         |                   |                   |
| <i>Allium vineale</i>                           |           |                   | 0.05±0.05         |                   |
| <i>Alyssum tortuosum</i>                        |           |                   |                   | 0.01±0.01         |
| <i>Ambrosia artemisiifolia</i>                  | 3.68±1.61 | 0.37±0.15         | 0.23±0.13         | 0.31±0.15         |
| <i>Anchusa officinalis</i>                      |           |                   | 0.35±0.30         | 0.05±0.05         |
| <i>Anthemis ruthenica</i>                       | 0.05±0.05 | 0.10±0.10         | 0.06±0.05         | 0.12±0.10         |
| <i>Apera spica-venti</i>                        |           | 0.01±0.01         |                   |                   |
| <i>Arenaria serpyllifolia</i>                   | 0.08±0.06 | 1.31±0.36         | 0.46±0.21         | 0.48±0.39         |
| <i>Asclepias syriaca</i>                        | 5.50±2.44 | 2.40±0.97         | 2.75±1.27         | 1.92±1.17         |
| <i>Bassia laniflora</i>                         | 7.32±5.29 | 13.45±3.89        | 1.61±1.19         | 1.15±0.42         |
| <i>Berteroa incana</i>                          | 0.20±0.15 | 0.50±0.34         | 0.15±0.11         | 0.20±0.20         |
| <i>Bothriochloa ischaemum</i>                   |           | 2.70±1.43         | 5.50±3.83         |                   |
| <i>Bromus squarrosus</i>                        |           | 0.11±0.10         |                   |                   |
| <i>Bromus tectorum</i>                          |           | 0.01±0.01         |                   |                   |
| <i>Calamagrostis epigejos</i>                   | 2.90±2.69 | 0.40±0.27         |                   |                   |
| <i>Carex stenophylla</i>                        |           | 1.90±0.86         |                   | 0.75±0.51         |
| <i>Cenchrus spinifex</i>                        | 8.40±7.22 |                   | 0.05±0.05         |                   |
| <i>Centaurea arenaria</i>                       | 0.03±0.03 | 0.01±0.01         |                   |                   |
| <i>Chondrilla juncea</i>                        | 0.62±0.60 | 0.11±0.10         | 0.10±0.10         |                   |
| <i>Convolvulus arvensis</i>                     | 0.05±0.05 | 0.35±0.21         |                   | 0.01±0.01         |
| <i>Conyza canadensis</i>                        | 0.18±0.15 |                   | 0.20±0.13         |                   |
| <i>Crataegus monogyna</i>                       |           | 0.01±0.01         |                   |                   |
| <i>Crepis foetida</i> subsp. <i>rheadifolia</i> | 0.05±0.05 | 0.77±0.41         |                   | 1.10±0.66         |
| <i>Cynodon dactylon</i>                         |           |                   | 2.80±2.07         | 2.50±2.50         |
| <i>Cynoglossum officinale</i>                   |           | 0.01±0.01         |                   |                   |
| <i>Dactylis glomerata</i>                       | 0.30±0.30 | 0.11±0.10         |                   |                   |
| <i>Echium vulgare</i>                           | 0.20±0.20 |                   |                   |                   |
| <i>Elymus repens</i>                            | 0.03±0.03 |                   | 0.20±0.20         |                   |
| <i>Equisteum ramosissimum</i>                   | 0.35±0.19 | 3.15±0.89         |                   | 0.17±0.10         |
| <i>Erigeron annuus</i>                          | 1.20±0.81 |                   | 0.05±0.05         | 0.31±0.30         |
| <i>Erodium cicutarium</i>                       |           | 0.10±0.10         |                   |                   |
| <i>Eryngium campestre</i>                       | 0.71±0.44 | 0.91±0.31         |                   | 0.25±0.20         |
| <i>Erysimum diffusum</i>                        | 0.16±0.15 | 0.12±0.04         | 0.45±0.26         | 0.03±0.02         |
| <i>Falcaria vulgaris</i>                        | 0.59±0.25 | 0.64±0.30         | 1.57±0.37         | 0.86±0.35         |
| <i>Fallopia convolvulus</i>                     | 0.03±0.03 |                   | 0.01±0.01         | 0.02±0.01         |
| <i>Festuca pseudovina</i>                       | 8.80±5.29 | 19.20±6.99        | 12.10±4.77        | 1.90±1.49         |
| <i>Gypsophila paniculata</i>                    | 0.15±0.11 | 1.22±0.72         | 0.40±0.31         | 0.15±0.11         |
| <i>Medicago lupulina</i>                        |           |                   |                   | 0.01±0.01         |
| <i>Medicago minima</i>                          | 0.01±0.01 | 0.02±0.01         | 0.06±0.05         |                   |
| <i>Nigella arvensis</i>                         |           | 0.06±0.05         |                   |                   |

23

24 **Electronic Appendix 2C continued.**

25

| <b>Species</b>                             | <b>I</b>   | <b>II</b> | <b>III</b> | <b>IV</b> |
|--------------------------------------------|------------|-----------|------------|-----------|
| <i>Oenothera biennis</i>                   |            | 0.15±0.15 |            |           |
| <i>Petrorhagia prolifera</i>               | 0.01±0.01  |           |            |           |
| <i>Picris hieracioides</i>                 |            | 0.01±0.01 |            |           |
| <i>Plantago indica</i>                     | 1.56±1.49  | 1.70±0.99 | 0.10±0.10  | 0.16±0.11 |
| <i>Plantago lanceolata</i>                 | 0.44±0.40  | 0.45±0.22 |            |           |
| <i>Poa angustifolia</i>                    | 18.50±9.13 | 2.20±1.99 | 5.11±4.00  | 1.15±0.89 |
| <i>Polygonum arenarium</i>                 |            | 0.02±0.01 |            |           |
| <i>Potentilla argentea</i>                 | 0.95±0.57  | 0.91±0.27 | 0.30±0.21  | 0.06±0.05 |
| <i>Rubus caesius</i>                       |            |           | 3.50±3.50  |           |
| <i>Rumex acetosella</i>                    | 1.43±0.85  | 0.31±0.21 | 0.05±0.05  | 0.10±0.10 |
| <i>Saponaria officinalis</i>               | 0.05±0.05  |           | 2.00±2.00  | 0.05±0.05 |
| <i>Scabiosa ochroleuca</i>                 | 0.25±0.25  | 0.11±0.10 |            |           |
| <i>Secale sylvestre</i>                    | 1.10±1.10  | 0.10±0.10 | 0.45±0.40  | 0.73±0.51 |
| <i>Setaria viridis</i>                     | 1.03±0.69  | 0.25±0.13 | 0.40±0.27  |           |
| <i>Silene conica</i>                       | 0.05±0.03  | 0.13±0.10 | 0.05±0.05  | 0.11±0.10 |
| <i>Silene latifolia</i> subsp. <i>alba</i> | 0.21±0.20  |           | 0.51±0.26  | 0.10±0.07 |
| <i>Silene otites</i>                       |            | 0.01±0.01 | 0.10±0.10  | 0.01±0.01 |
| <i>Thesium arvense</i>                     |            | 0.10±0.10 |            |           |
| <i>Tragopogon orientalis</i>               | 0.16±0.10  | 0.20±0.20 | 0.25±0.20  |           |
| <i>Tribulus terrestris</i>                 | 0.25±0.25  |           |            |           |
| <i>Verbascum lychnitis</i>                 | 0.70±0.52  |           | 1.50±1.50  | 0.05±0.05 |
| <i>Verbascum phlomoides</i>                |            | 0.35±0.30 |            |           |
| <i>Veronica praecox</i>                    |            | 0.01±0.01 |            |           |
| <i>Vicia grandiflora</i>                   |            | 0.01±0.01 | 0.30±0.15  | 0.20±0.20 |

26

27 **Electronic Appendix 2D.** Species composition of the vegetation at the Airport (A) study site.  
 28 Cover categories: I: nearby reference sites where *Sporobolus* is missing, II: 1-25% of  
 29 *Sporobolus* cover, III: 26-50% of *Sporobolus* cover, IV >50% of *Sporobolus* cover. In each  
 30 cover category the cover scores of species of 10, 1-m<sup>2</sup>-sized plots were averaged (mean±SE).  
 31

| Species                                            | I          | II               | III               | IV                |
|----------------------------------------------------|------------|------------------|-------------------|-------------------|
|                                                    | Mean       | Mean             | Mean              | Mean              |
| <i>Sporobolus cryptandrus</i>                      |            | <b>8.40±1.31</b> | <b>32.20±2.32</b> | <b>63.10±2.95</b> |
| <i>Achillea collina</i>                            | 1.23±1.20  | 0.20±0.20        |                   |                   |
| <i>Allium vineale</i>                              |            |                  | 0.20±0.20         |                   |
| <i>Alyssum tortuosum</i>                           | 0.97±0.51  | 0.42±0.20        | 0.72±0.34         | 0.60±0.26         |
| <i>Ambrosia artemisiifolia</i>                     |            |                  | 0.30±0.21         | 0.01±0.01         |
| <i>Arenaria serpyllifolia</i>                      | 0.01±0.01  | 0.10±0.07        |                   | 0.06±0.05         |
| <i>Artemisia campestris</i>                        |            | 0.75±0.59        | 0.10±0.10         |                   |
| <i>Asperula cynanchica</i>                         | 2.68±1.77  | 1.66±0.74        | 0.10±0.10         |                   |
| <i>Bassia laniflora</i>                            |            |                  | 0.10±0.10         |                   |
| <i>Bothriochloa ischaemum</i>                      | 20.15±5.58 | 18.20±4.37       | 5.20±3.51         | 1.40±1.00         |
| <i>Bromus squarrosus</i>                           | 0.09±0.04  | 0.09±0.04        | 0.03±0.02         | 0.03±0.02         |
| <i>Bromus tectorum</i>                             |            |                  | 0.10±0.10         |                   |
| <i>Buglossoides arvensis</i>                       |            |                  | 0.21±0.20         |                   |
| <i>Carex liparocarpos</i>                          | 8.20±1.96  | 5.80±1.82        | 6.80±3.17         | 1.90±1.48         |
| <i>Carex stenophylla</i>                           | 0.05±0.05  | 0.01±0.01        | 4.00±4.00         | 0.30±0.21         |
| <i>Centaurea arenaria</i>                          | 0.06±0.04  | 0.83±0.35        | 1.68±0.90         | 0.10±0.07         |
| <i>Centaurea scabiosa</i> subsp. <i>sadleriana</i> | 1.00±1.00  |                  |                   | 0.05±0.05         |
| <i>Chondrilla juncea</i>                           | 0.03±0.03  |                  | 0.10±0.10         |                   |
| <i>Convolvulus arvensis</i>                        | 0.02±0.02  | 0.01±0.01        |                   |                   |
| <i>Crepis foetida</i> subsp. <i>rhoeadifolia</i>   | 0.31±0.21  |                  | 0.05±0.05         | 0.21±0.20         |
| <i>Cynodon dactylon</i>                            | 12.10±4.07 | 8.60±2.78        | 12.30±2.91        | 3.00±0.84         |
| <i>Cynoglossum officinale</i>                      |            |                  | 0.01±0.01         |                   |
| <i>Equisteum ramosissimum</i>                      | 0.33±0.21  | 0.53±0.22        | 1.41±0.80         | 0.71±0.47         |
| <i>Erodium cicutarium</i>                          |            |                  | 0.39±0.29         |                   |
| <i>Eryngium campestre</i>                          | 0.56±0.25  | 0.62±0.40        | 0.90±0.50         | 1.00±0.26         |
| <i>Euphorbia cyparissias</i>                       | 2.55±1.59  | 2.30±1.10        | 3.75±1.66         | 2.70±2.01         |
| <i>Euphorbia seguieriana</i>                       |            | 0.10±0.10        | 4.20±3.10         |                   |
| <i>Festuca pseudovina</i>                          |            | 0.20±0.20        | 0.10±0.10         |                   |
| <i>Galium verum</i>                                |            | 0.80±0.70        |                   |                   |
| <i>Gypsophila paniculata</i>                       | 0.10±0.10  |                  | 1.60±0.93         | 0.50±0.50         |
| <i>Hieracium bauhini</i>                           |            |                  | 0.10±0.10         |                   |
| <i>Koeleria pyramidata</i>                         | 0.10±0.10  | 1.11±0.82        | 0.10±0.10         |                   |
| <i>Medicago falcata</i>                            | 2.66±1.61  | 2.35±1.61        | 0.70±0.52         | 0.85±0.35         |
| <i>Medicago lupulina</i>                           |            |                  |                   | 0.05±0.05         |
| <i>Medicago minima</i>                             | 0.04±0.03  |                  | 0.06±0.05         | 0.01±0.01         |
| <i>Minuartia verna</i>                             |            | 0.07±0.05        | 0.02±0.01         |                   |
| <i>Muscari neglectum</i>                           | 0.03±0.02  | 0.03±0.02        | 0.09±0.05         | 0.04±0.02         |
| <i>Plantago indica</i>                             |            |                  | 0.20±0.20         |                   |
| <i>Plantago lanceolata</i>                         | 0.05±0.05  | 0.56±0.34        | 0.10±0.10         | 0.50±0.34         |
| <i>Poa angustifolia</i>                            | 0.01±0.01  |                  | 0.05±0.05         |                   |
| <i>Poa bulbosa</i>                                 | 0.09±0.04  | 0.15±0.11        | 0.12±0.06         | 0.03±0.02         |

33 **Electronic Appendix 2D continued.**

34

| <b>Species</b>               | <b>I</b>  | <b>II</b> | <b>III</b> | <b>IV</b> |
|------------------------------|-----------|-----------|------------|-----------|
| <i>Polygonum arenarium</i>   |           | 0.01±0.01 | 0.12±0.06  | 0.01±0.01 |
| <i>Potentilla argentea</i>   |           |           | 0.10±0.10  |           |
| <i>Potentilla incana</i>     | 4.48±0.97 | 9.40±1.19 | 3.65±1.14  | 2.71±0.87 |
| <i>Scabiosa ochroleuca</i>   | 0.01±0.01 | 0.24±0.13 |            |           |
| <i>Silene conica</i>         |           | 0.01±0.01 |            |           |
| <i>Silene otites</i>         | 0.10±0.10 | 0.01±0.01 |            | 0.10±0.10 |
| <i>Stipa pennata</i>         | 0.84±0.55 | 0.10±0.10 |            |           |
| <i>Thesium arvense</i>       | 0.03±0.03 | 0.01±0.01 |            |           |
| <i>Thymus pannonicus</i>     | 0.30±0.21 |           |            |           |
| <i>Tragopogon orientalis</i> |           |           | 0.05±0.05  |           |
| <i>Veronica prostrata</i>    | 0.05±0.05 |           | 0.10±0.10  |           |

35



36 **Electronic Appendix 2E.** Species composition of vegetation at the Kiskunhalas East study  
 37 site. Cover categories: I: nearby reference sites where *Sporobolus* is missing, II: 1-25% of  
 38 *Sporobolus* cover, III: 26-50% of *Sporobolus* cover, IV >50% of *Sporobolus* cover. In each  
 39 cover category the cover scores of species of 10, 1-m<sup>2</sup>-sized plots were averaged (mean±SE).  
 40

| Species                                          | I          | II                | III               | IV                |
|--------------------------------------------------|------------|-------------------|-------------------|-------------------|
| <i>Sporobolus cryptandrus</i>                    |            | <b>13.40±1.33</b> | <b>34.00±1.78</b> | <b>67.30±3.58</b> |
| <i>Alkanna tinctoria</i>                         |            |                   | 0.01±0.01         |                   |
| <i>Alyssum tortuosum</i>                         |            |                   |                   | 0.06±0.05         |
| <i>Ambrosia artemisiifolia</i>                   | 1.20±0.63  | 0.43±0.20         | 2.75±0.55         | 0.48±0.21         |
| <i>Anthemis ruthenica</i>                        |            |                   | 0.05±0.05         |                   |
| <i>Arenaria serpyllifolia</i>                    |            | 0.02±0.01         |                   | 0.07±0.05         |
| <i>Artemisia campestris</i>                      |            |                   |                   | 0.05±0.05         |
| <i>Asclepias syriaca</i>                         | 0.55±0.50  |                   |                   |                   |
| <i>Ballota nigra</i>                             | 0.50±0.50  |                   |                   |                   |
| <i>Bassia laniflora</i>                          | 0.13±0.07  | 0.25±0.13         | 0.57±0.20         | 0.82±0.33         |
| <i>Bothriochloa ischaemum</i>                    | 1.00±1.00  | 4.71±2.12         | 0.05±0.05         | 0.80±0.80         |
| <i>Bromus squarrosus</i>                         | 0.25±0.20  | 0.34±0.14         | 0.07±0.05         | 0.08±0.05         |
| <i>Bromus tectorum</i>                           |            | 0.40±0.31         | 0.35±0.30         | 0.72±0.33         |
| <i>Calamagrostis epigejos</i>                    | 6.60±4.92  |                   |                   |                   |
| <i>Carex liparicarpos</i>                        | 7.75±2.80  | 7.65±3.54         | 1.70±0.30         | 1.70±0.55         |
| <i>Carex stenophylla</i>                         |            | 0.05±0.05         |                   |                   |
| <i>Cenchrus spinifex</i>                         |            |                   | 0.01±0.01         |                   |
| <i>Centaurea arenaria</i>                        | 0.10±0.10  | 1.30±0.40         | 3.21±1.74         | 0.67±0.42         |
| <i>Chondrilla juncea</i>                         |            |                   |                   | 0.10±0.10         |
| <i>Convolvulus arvensis</i>                      | 1.00±1.00  |                   |                   |                   |
| <i>Conyza canadensis</i>                         | 0.20±0.15  | 0.05±0.05         | 0.55±0.26         | 0.56±0.26         |
| <i>Crataegus monogyna</i>                        |            |                   | 0.70±0.70         | 0.40±0.40         |
| <i>Crepis foetida</i> subsp. <i>rhoeadifolia</i> | 2.01±2.00  | 0.41±0.16         | 1.56±0.41         | 1.80±0.95         |
| <i>Cynodon dactylon</i>                          | 2.06±1.52  | 0.40±0.30         |                   | 0.30±0.30         |
| <i>Echium vulgare</i>                            | 2.00±2.00  |                   |                   |                   |
| <i>Elymus repens</i>                             | 12.46±8.24 |                   |                   |                   |
| <i>Eryngium campestre</i>                        | 0.40±0.23  | 0.61±0.26         | 0.10±0.07         | 0.50±0.26         |
| <i>Erysimum diffusum</i>                         | 0.01±0.01  | 0.01±0.01         |                   |                   |
| <i>Euphorbia cyparissias</i>                     | 3.93±1.79  | 2.70±1.96         | 0.10±0.10         | 0.40±0.40         |
| <i>Euphorbia seguieriana</i>                     | 0.44±0.30  | 5.65±1.97         | 1.80±0.55         | 1.51±0.76         |
| <i>Festuca vaginata</i>                          | 3.00±3.00  | 9.40±5.17         | 5.70±3.46         | 0.60±0.34         |
| <i>Festuca wagneri</i>                           |            | 1.30±0.60         |                   |                   |
| <i>Galium verum</i>                              | 1.75±0.98  |                   |                   |                   |
| <i>Koeleria glauca</i>                           | 0.30±0.30  | 0.10±0.10         |                   | 0.30±0.21         |
| <i>Koeleria pyramidata</i>                       |            | 0.35±0.30         | 0.10±0.10         |                   |
| <i>Linaria genistifolia</i>                      |            | 0.10±0.10         | 0.20±0.20         |                   |
| <i>Medicago falcata</i>                          | 0.22±0.20  | 0.10±0.10         |                   |                   |
| <i>Medicago minima</i>                           | 0.01±0.01  | 0.16±0.10         | 0.26±0.11         | 0.17±0.10         |
| <i>Minuartia glomerata</i>                       |            | 0.21±0.13         | 0.40±0.30         | 0.05±0.05         |
| <i>Poa angustifolia</i>                          | 5.70±3.95  |                   |                   | 0.10±0.10         |
| <i>Poa bulbosa</i>                               |            | 0.11±0.10         | 0.01±0.01         | 0.14±0.06         |
| <i>Polygonum arenarium</i>                       | 0.03±0.02  | 0.58±0.19         | 0.57±0.21         | 0.14±0.10         |

41 **Electronic Appendix 2E continued.**

42

| <b>Species</b>                             | <b>I</b>   | <b>II</b> | <b>III</b> | <b>IV</b> |
|--------------------------------------------|------------|-----------|------------|-----------|
| <i>Potentilla incana</i>                   | 6.00±3.01  | 3.30±0.94 |            | 1.00±1.00 |
| <i>Robinia pseudoacacia</i>                |            |           | 0.40±0.40  |           |
| <i>Salsola kali</i>                        |            | 0.10±0.10 | 0.05±0.05  | 0.02±0.01 |
| <i>Scirpoides holoschoenus</i>             |            | 0.31±0.30 | 0.10±0.10  |           |
| <i>Secale sylvestre</i>                    |            | 0.30±0.21 | 0.01±0.01  | 0.20±0.11 |
| <i>Setaria viridis</i>                     | 0.08±0.06  | 0.73±0.51 | 0.07±0.05  | 0.10±0.10 |
| <i>Silene conica</i>                       |            | 0.01±0.01 | 0.02±0.01  | 0.11±0.07 |
| <i>Silene latifolia</i> subsp. <i>alba</i> | 2.10±1.99  |           |            |           |
| <i>Stipa capillata</i>                     |            | 0.30±0.21 |            |           |
| <i>Stipa pennata</i>                       | 12.80±4.39 | 3.50±2.42 | 1.20±0.49  | 0.70±0.70 |
| <i>Teucrium chamaedrys</i>                 | 8.50±5.97  |           |            |           |
| <i>Thymus pannonicus</i>                   | 4.05±2.50  | 4.51±2.76 | 1.21±0.68  | 0.51±0.34 |
| <i>Tragopogon orientalis</i>               |            | 0.05±0.05 |            |           |
| <i>Verbascum lychnitis</i>                 | 0.10±0.10  | 0.10±0.10 | 0.20±0.20  |           |
| <i>Veronica prostrata</i>                  | 0.10±0.10  |           |            |           |
| <i>Viola rupestris</i>                     | 0.05±0.05  |           |            |           |

43

**Electronic Appendix 3.** Seed bank composition of the sites with an increasing cover of *Sporobolus cryptandrus*. In the table seedling numbers are shown.

| Species in the seed bank            |     | Sporobolus cover in the vegetation |       |       |        |           |       |       |        |             |       |       |        |            |       |       |        |
|-------------------------------------|-----|------------------------------------|-------|-------|--------|-----------|-------|-------|--------|-------------|-------|-------|--------|------------|-------|-------|--------|
|                                     |     | I: 0%                              |       |       |        | II: 1-25% |       |       |        | III: 26-50% |       |       |        | IV: 50-75% |       |       |        |
|                                     |     | 0-2.5                              | 2.5-5 | 5-7.5 | 7.5-10 | 0-2.5     | 2.5-5 | 5-7.5 | 7.5-10 | 0-2.5       | 2.5-5 | 5-7.5 | 7.5-10 | 0-2.5      | 2.5-5 | 5-7.5 | 7.5-10 |
| <i>Arenaria leptoclados</i>         | 502 | 108                                | 24    | 11    | 10     | 238       | 31    | 24    | 23     | 8           | 7     | 2     | 2      | 3          | 7     | 3     | 1      |
| <i>Portulaca oleracea</i>           | 492 | 12                                 | 57    | 34    | 39     | 54        | 45    | 19    | 22     | 23          | 35    | 35    | 10     | 24         | 48    | 19    | 16     |
| <i>Sporobolus cryptandrus</i>       | 320 | 3                                  | 22    | 8     | 9      | 39        | 4     | 3     | 6      | 70          | 26    | 9     | 5      | 90         | 13    | 8     | 5      |
| <i>Potentilla argentea</i>          | 200 | 28                                 | 2     | 14    | 8      | 31        | 16    | 9     | 2      | 20          | 10    | 10    | 4      | 21         | 15    | 8     | 2      |
| <i>Digitaria sanguinalis</i>        | 153 | 29                                 | 2     | 2     | 8      | 88        | 5     | 7     | 5      | 4           |       | 2     |        | 1          |       |       |        |
| <i>Cerastium semidecandrum</i>      | 104 | 16                                 | 3     | 3     | 2      | 60        | 6     | 1     | 2      | 3           | 1     |       |        | 7          |       |       |        |
| <i>Veronica</i> sp.                 | 65  | 19                                 | 11    | 2     | 8      | 4         | 4     | 2     | 1      | 6           | 3     | 1     | 1      | 2          | 1     |       |        |
| <i>Poa annua</i>                    | 55  | 6                                  | 1     |       |        | 9         |       |       |        | 24          | 1     | 1     |        | 12         |       |       | 1      |
| <i>Scleranthus annuus</i>           | 43  | 9                                  | 1     |       |        | 25        |       |       |        |             |       |       |        | 8          |       |       |        |
| Poaceae sp.                         | 37  | 3                                  |       | 2     |        | 3         |       |       |        | 15          | 3     | 1     |        | 9          |       | 1     |        |
| <i>Capsella bursa-pastoris</i>      | 34  | 20                                 | 1     | 3     | 7      | 1         |       |       |        |             |       |       |        | 2          |       |       |        |
| <i>Erophila verna</i>               | 29  | 3                                  | 1     |       |        | 5         | 2     |       | 1      | 5           |       |       |        | 12         |       |       |        |
| <i>Erodium cicutarium</i>           | 23  |                                    |       |       |        | 2         |       |       |        | 16          |       | 1     | 1      | 3          |       |       |        |
| <i>Plantago lanceolata</i>          | 15  | 10                                 | 3     |       |        | 2         |       |       |        |             |       |       |        |            |       |       |        |
| <i>Oxalis corniculata</i>           | 10  | 0                                  | 2     | 3     |        | 1         | 1     |       |        |             | 1     |       | 2      |            |       |       |        |
| <i>Conyza canadensis</i>            | 8   | 7                                  | 1     |       |        |           |       |       |        |             |       |       |        |            |       |       |        |
| <i>Bromus</i> cf. <i>arvensis</i>   | 5   |                                    |       |       |        | 4         |       |       |        | 1           |       |       |        |            |       |       |        |
| <i>Eragrostis minor</i>             | 5   |                                    |       |       |        | 1         |       |       |        |             |       |       |        | 1          | 2     |       | 1      |
| <i>Medicago minima</i>              | 5   | 1                                  |       | 1     | 1      |           | 1     |       |        |             |       |       |        | 1          |       |       |        |
| <i>Carex</i> cf. <i>stenophylla</i> | 4   |                                    |       |       |        | 1         |       | 1     |        | 1           |       |       |        |            |       | 1     |        |
| <i>Poa angustifolia</i>             | 4   |                                    |       |       |        |           |       |       |        |             |       |       |        | 2          | 2     |       |        |
| <i>Epilobium</i> sp.                | 3   | 1                                  |       |       |        | 2         |       |       |        |             |       |       |        |            |       |       |        |
| <i>Juncus articulatus</i>           | 2   | 1                                  |       |       |        |           |       | 1     |        |             |       |       |        |            |       |       |        |
| <i>Medicago lupulina</i>            | 2   |                                    |       | 1     |        |           |       |       |        |             |       |       |        |            |       | 1     |        |
| <i>Melandrium album</i>             | 2   |                                    |       |       |        |           |       |       |        |             |       |       |        |            |       | 2     |        |
| <i>Trifolium repens</i>             | 2   | 2                                  |       |       |        |           |       |       |        |             |       |       |        |            |       |       |        |
| <i>Stellaria media</i>              | 2   |                                    |       |       |        | 2         |       |       |        |             |       |       |        |            |       |       |        |
| <i>Vicia lathyroides</i>            | 2   |                                    |       |       |        |           |       |       |        | 2           |       |       |        |            |       |       |        |
| <i>Eragrostis minor</i>             | 1   |                                    |       |       |        |           |       | 1     |        |             |       |       |        |            |       |       |        |

3 **Electronic Appendix 3.** Continued.

4

| Species                             | Sporobolus cover |            |            |            |           |            |            |            |           |            |           |            |           |            |           |            |           |
|-------------------------------------|------------------|------------|------------|------------|-----------|------------|------------|------------|-----------|------------|-----------|------------|-----------|------------|-----------|------------|-----------|
|                                     | 0%               |            |            |            | 1-25%     |            |            |            | 26-50%    |            |           |            | 50-75%    |            |           |            |           |
|                                     | 0-<br>2.5        | 2.5-<br>5  | 5-<br>7.5  | 7.5-<br>10 | 0-<br>2.5 | 2.5-<br>5  | 5-<br>7.5  | 7.5-<br>10 | 0-<br>2.5 | 2.5-<br>5  | 5-<br>7.5 | 7.5-<br>10 | 0-<br>2.5 | 2.5-<br>5  | 5-<br>7.5 | 7.5-<br>10 |           |
| <i>Poa pratensis</i>                | 1                |            |            |            | 1         |            |            |            |           |            |           |            |           |            |           |            |           |
| <i>Juncus effusus/conglomeratus</i> | 1                | 1          |            |            |           |            |            |            |           |            |           |            |           |            |           |            |           |
| <i>Anthemis ruthenica</i>           | 1                | 1          |            |            |           |            |            |            |           |            |           |            |           |            |           |            |           |
| <b>Total number of seedlings</b>    | <b>2132</b>      | <b>280</b> | <b>131</b> | <b>84</b>  | <b>92</b> | <b>573</b> | <b>115</b> | <b>67</b>  | <b>63</b> | <b>198</b> | <b>87</b> | <b>65</b>  | <b>25</b> | <b>198</b> | <b>88</b> | <b>40</b>  | <b>26</b> |

5

6 **Footnote:** The seed density for 1 m<sup>2</sup> can be calculated if the above scores are multiplied with ~26.53 (surface area of 30 soil cores in total from 3  
7 plots, 4 cm diameter of a cylindrical corer compared to 10,000 cm<sup>2</sup>). This means for example that the seed density of *Arenaria leptoclados* for I  
8 0-2.5cm layer (108 seeds) reads as 2,865 seeds/m<sup>2</sup>.
